1 **Unjamming overcomes kinetic and proliferation arrest in terminally differentiated cells and**  
2 **promotes collective motility of carcinoma**

3

4 Andrea Palamidessi<sup>1#</sup>, Chiara Malinverno<sup>1,2,6#</sup>, Emanuela Frittoli<sup>1#</sup>, Salvatore Corallino<sup>1</sup>, Elisa  
5 Barbieri<sup>3</sup>, Sara Sigismund<sup>2,3</sup>, Pier Paolo Di Fiore<sup>2,3</sup>, Galina V. Beznoussenko<sup>1</sup>, Emanuele Martini<sup>1</sup>,  
6 Massimiliano Garre<sup>1</sup>, Dario Parazzoli<sup>1</sup>, Ines Ferrara<sup>4</sup>, Claudio Tripodo<sup>4</sup>, Fabio Giavazzi<sup>5,6</sup>, Roberto  
7 Cerbino<sup>5,6</sup>, Giorgio Scita<sup>1,3,6</sup>.

8

9 <sup>1</sup>IFOM, the FIRC Institute of Molecular Oncology, Via Adamello 16, 20139, Milan, Italy

10 <sup>2</sup>University of Milan, Department of Oncology and Hemato-Oncology, Via Festa del Perdono 7,  
11 20122 Milan, Italy.

12 <sup>3</sup>Program of Molecular Medicine, European Institute of Oncology, Via Ripamonti 435, Milan, 20141,  
13 Italy

14 <sup>4</sup>Department of Health Sciences, Human Pathology Section, University of Palermo School of  
15 Medicine Via del Vespro 129, 90127, Palermo, Italy.

16 <sup>5</sup>University of Milan, Department of Medical Biotechnology and Translational Med., I-20090  
17 Segrate, Italy

18

19 # These authors contributed equally to this work.

20

21 <sup>6</sup>These authors are all equally responsible for this work.

22

23 Correspondence to: [Giorgio.Scita@ifom.eu](mailto:Giorgio.Scita@ifom.eu) or [Chiara.Malinverno@ifom.eu](mailto:Chiara.Malinverno@ifom.eu) or  
24 [roberto.cerbino@unimi.it](mailto:roberto.cerbino@unimi.it)

25

26

27

28 **Abstract**

29

30 During wound repair, branching morphogenesis and carcinoma dissemination, cellular  
31 rearrangements are fostered by a solid-to-liquid transition known as unjamming. The biomolecular  
32 machinery behind unjamming, its physiological and clinical relevance remain, however, a mystery.  
33 Here, we combine biophysical and biochemical analysis to study unjamming in a variety of epithelial  
34 2D and 3D collectives: monolayers, differentiated normal mammary cysts, spheroid models of breast  
35 ductal carcinoma in situ (DCIS), and *ex vivo* slices of orthotopically-implanted DCIS. In all cases,  
36 elevation of the small GTPase RAB5A sparks unjamming by promoting non-clathrin-dependent  
37 internalization of epidermal growth factor receptor that leads to hyper-activation of endosomally-  
38 confined ERK1/2 and phosphorylation of the actin nucleator WAVE2. Physically, activation of this  
39 pathway causes highly coordinated flocking of the cells, with striking rotational motion in 3D that  
40 eventually leads to matrix remodelling and collective invasiveness of otherwise jammed carcinoma.  
41 The identified endo-ERK1/2 pathway provides an effective switch for unjamming through flocking  
42 to promote epithelial tissues morphogenesis and carcinoma invasion and dissemination.

43

## 44 **Introduction**

45 Collective motility, a widely recognized mode of migration during embryogenesis, wound repair  
46 and cancer<sup>1,2</sup>, refers to the process of many cells migrating as a cohesive group with a high degree of  
47 coordination between neighbouring cells. A complex network of biochemical and physical  
48 interactions governs cellular and multicellular motility<sup>2-5</sup>. How cellular and supra-cellular  
49 biomechanics and biochemical wiring are integrated and impact onto each other remains, however,  
50 largely unexplored.

51 An emerging framework to interpret these interactions in unifying principles is the notion of cell  
52 jamming<sup>6-8</sup>. During tissue growth, cells are rather free to move around, as in a fluid. As density rises,  
53 the motion of each cell is constrained by the crowding due to its neighbours. At a critical density,  
54 motility ceases and collectives rigidify undergoing a liquid (unjammed)-to-solid (jammed)  
55 transition<sup>6-8</sup>, herein referred to as UJT. This transition, which depends on a variety of biophysical  
56 parameters such as intercellular adhesion, cortical tension and single cell motility, is thought to ensure  
57 proper development of barrier properties in epithelial tissues, but also to act as a tumour suppressive  
58 mechanism<sup>6-9</sup>. The reverse jamming-to-unjamming transition (JUT) might, instead, represent a  
59 complementary gateway to epithelial cell migration, enabling tissues to escape the caging imposed  
60 by the crowded cellular landscape of mature epithelia<sup>6, 9-11</sup>. Indeed, whereas Epithelial-to-  
61 Mesenchymal Transition (EMT) has emerged as the overarching mechanism enabling the  
62 dissemination of single tumour cells<sup>12,13</sup>, invasion by epithelial malignancies (carcinomas) frequently  
63 involves the collective migration of cohesive cohorts (nests, sheets, or glandular/tubular structures)  
64 of cells into adjacent tissues rather than the scattering of individual carcinoma cells<sup>14, 15</sup>. A number  
65 of recent findings supports this hypothesis: i) breast carcinoma frequently disseminate by keeping  
66 their epithelial identity, i.e. tight cell-cell interactions and organization into cell cohorts or clusters<sup>16,</sup>  
67 <sup>17</sup>; ii) circulating cancer cells efficiently seed distant metastasis by forming epithelial cell clusters that  
68 maintain cohesive cell-cell interactions, and by doing so display increased metastatic seeding

69 potential<sup>18</sup>; iii) histopathological studies suggest that human invasive ductal breast carcinoma (DCIS)  
70 can invade collectively as strands or clusters that retain E-Cadherin-based cellular junctions<sup>19,20</sup>; iv)  
71 late-stage HER2-expressing murine mammary cancers have been shown to undergo kinetic arrest and  
72 display reduced metastatic potential as a consequence of increased density and cell packing<sup>21, 22</sup>.  
73 These findings further imply that mechanisms capable of overcoming the jammed, kinetically silent  
74 state of advanced epithelial malignancies might promote cancer dissemination without the need to  
75 invoke changes of cell identity or rewiring of transcriptional programs. However, how cells control  
76 the JUT is unclear.

77 Membrane trafficking circuitries have emerged as pivotal in regulating the duration, intensity, and  
78 spatial distribution of signals, thereby contributing to pathway specificity<sup>23,24</sup>, with a primary role on  
79 cell migration plasticity and on the mechanics of cell-cell interactions<sup>25-27</sup>. Consistent with the above  
80 notion, we recently found that endocytic circuitries controlled by RAB5A, a master regulator of early  
81 endosomes necessary to promote a proteolytic, mesenchymal program of individual cancer cell  
82 invasion<sup>28, 29</sup>, have a dramatic impact on the mechanics and dynamics of multicellular, normal and  
83 tumorigenic, cell assemblies<sup>30</sup>. Elevation of RAB5A levels is sufficient to re-awaken the motility of  
84 otherwise jammed and kinetically arrested epithelial monolayers<sup>30</sup>. RAB5A does so by increasing  
85 monolayers stiffness, cell-cell surface contact and junctional tension, while concomitantly  
86 accelerating the turnover of junctional E-cadherin<sup>30</sup>. RAB5A further promotes millimetres-scale,  
87 ballistic locomotion of multicellular streams by augmenting the extension of oriented and persistent  
88 RAC1-driven, protrusions<sup>30</sup>. These effects combine to endow monolayers with a flocking fluid mode  
89 of motion, which is explained in numerical simulations in terms of large scale coordinated migration  
90 and local unjamming, driven by an increased capability of each individual cell to align its velocity to  
91 the one of the surrounding group<sup>30-32</sup>. Molecularly, impairing endocytosis, macropinocytosis or  
92 increasing fluid efflux abrogated RAB5A-induced collective motility, suggesting that perturbations  
93 of trafficking processes impacting on different signalling and biomechanical pathways are necessary

94 for the JUT. However, the molecular nature of these endocytic-sensitive pathways remains to be  
95 identified. Even less clear is whether JUT occurs in relevant physiological setting and whether is  
96 hijacked by dense and jammed carcinoma to promote their collective dissemination.

97 Here, using kinematic and biochemical analysis of jammed monolayers dynamics, we showed that  
98 enhanced epidermal growth factor receptor (EGFR) internalization through non-clathrin dependent  
99 routes leads to endosomal ERK1/2 hyper-activation and phosphorylation of the branched actin  
100 nucleator, WAVE2<sup>33, 34</sup>. This endo-ERK1/2 pathway, in turn, is critical to promote a transition to a  
101 flocking-liquid mode of collective motility. Importantly, this pathway is also sufficient to overcome  
102 kinetic and proliferation arrest of fully differentiated normal mammary cysts in 3D, and to initiate  
103 bud morphogenesis. In DCIS models, instead, endocytic-mediated unjamming endows tumour  
104 spheroids embedded into thick collagen matrix with a striking and coordinated circular angular  
105 motion (CAM), that promotes matrix remodelling and collective local invasion, recapitulating what  
106 is observed in DCIS foci orthotopically implanted into recipient mice. We propose that the EGF-  
107 dependent activation of endosomal ERK1/2 as the first identified molecular route to the JUT via  
108 flocking, sufficient to overcome the kinetic and proliferation arrest of terminal differentiated  
109 epithelial cells, and to promote collective invasive programs of jammed breast carcinoma.

110 **Results**

111

112 **Endocytic reawakening of motility depends on EGFR activation and is caused by alterations of**  
113 **EGFR trafficking**

114 RAB5A is deregulated in breast cancer (BC)<sup>29, 35</sup>. By focusing on early stages of BC progression, we  
115 found that RAB5A expression was variably low in malignant cells of densely-packed and jammed  
116 ductal carcinoma in situ (DCIS) foci and increased at foci of DCIS with invasion or in overt  
117 infiltrating cancers (Fig. 1A). Additionally, its elevated expression is detected in various malignant,  
118 aggressive BC cell lines (Fig. 1B), and, more relevantly, correlates with worse relapse free probability  
119 in various BC subtypes (Fig. S1). We employ doxycycline-inducible RAB5A-MCF10A-line to  
120 induce the expression of the GTPase to levels that mimic those encountered in human DCIS (Fig.  
121 1B), and study the molecular mechanisms of RAB5A impact on multicellular kinematics and  
122 jamming transition<sup>30</sup>. Fully confluent, dense epithelial monolayers of normal mammary MCF10A  
123 cells are locked into a jammed, solid state characterized by a full kinetic arrest (Ref.<sup>30</sup> and Movie  
124 S1 and S4). Doxycycline-mediated induction of RAB5A is sufficient to reawaken the motility by  
125 promoting large cellular streams (Fig. 1C-D and Movie S1-4 and ref.<sup>30</sup>). Particle Image Velocimetry  
126 (PIV) analysis was used to capture the kinematic of cell locomotion in jammed epithelia. As  
127 previously reported<sup>30</sup>, RAB5A expression enhanced robustly the root mean square velocity ( $v_{RMS}$ ) of  
128 the cells, and promoted millimetres-scale cell coordination as revealed by calculating the correlation  
129 length,  $L_{corr}$ , as the width of the correlation function  $C_{VV}(r) = \frac{\langle \mathbf{v}(\mathbf{x}_0+r) \cdot \mathbf{v}(\mathbf{x}_0) \rangle}{\langle |\mathbf{v}(\mathbf{x}_0)|^2 \rangle}$  of the (vectorial) velocity  
130  $\mathbf{v}(\mathbf{x}_0)$ , whose typical width provides an estimate of the velocity correlation length<sup>36</sup>. We also  
131 quantified cellular motion using the Mean Square Displacement (MSD) over a given time interval,  
132  $\Delta t$ , averaged over many cells in several optical fields (see Methods), which was used to extract an  
133 estimate of the persistence length,  $L_{pers}$ <sup>36</sup>. The latter corresponds to the distance travelled by a cell at  
134 constant velocity before the direction of its motion becomes uncorrelated with the initial one.  
135 RAB5A-expression promoted persistent and ballistic collective motion over a distance larger than

136 700  $\mu\text{m}$ , consistent with monolayers acquiring a flowing, liquid mode of motion. Removal of EGF,  
137 required for proliferation and single cell motility of MCF10A<sup>37</sup>, or addition of AG1478, an inhibitor  
138 of EGFR kinase<sup>38</sup>, arrested the flowing mode of motion induced by RAB5A (Fig. 1C-D and Movie  
139 S1 and S2 and S4), reduced  $v_{RMS}$ ,  $L_{corr}$ , and  $L_{pers}$  to values seen in control cells. These treatments  
140 further impacted on the uniformity of the migration pattern captured by local alignment ( $a$ ) of the  
141 velocity vector with respect to the mean velocity, which varies between +1 and -1 when it is parallel  
142 or antiparallel to the mean direction of migration, respectively (Fig. 1D). We further corroborated  
143 these results using EGFP-H2B control and RAB5A-expressing cells to visualize directly nuclear cell  
144 displacement within the epithelial collective (Movie S3). Finally, similar EGF-dependency of  
145 collective motion was also observed in jammed keratinocyte monolayers, HaCat, (Ref.<sup>30</sup> and not  
146 shown) and in oncogenically-transformed MCF10A variants, MCF10.DCIS.com (see below Fig. S5A  
147 and Movie S16).

148 This finding is consistent with the possibility that alterations of endosomal biogenesis caused by  
149 RAB5A<sup>39</sup> and leading to reawakening of collective motion<sup>30</sup> might specifically perturb EGFR cellular  
150 distribution, trafficking or signalling. We set out to test these possibilities. Firstly, we showed that  
151 the total protein, but not mRNA levels of EGFR were significantly reduced following induction of  
152 RAB5A expression (Fig. 2A). The fraction of phosphorylated EGFR was, instead, unexpectedly  
153 increased (Fig. 2A, Table), suggesting an impact of RAB5A on cellular distribution and trafficking  
154 of this receptor. Consistently, immunofluorescent analysis revealed that RAB5A-expressing cells  
155 display a marked reduction of cell surface EGFR, as detected in non-permeabilized cells,  
156 accompanied by a sizable increase of intracellular EGFR, which accumulates in EEA1 positive  
157 vesicle (Fig. 2B-C). Measurements of the absolute number of surface EGFR using <sup>125</sup>I-EGF binding  
158 corroborated the immunofluorescence (IF) data (Fig. 2D). MCF10A are grown in the presence of  
159 saturating dose of EGF (20 ng/ml), which binds and activates EGFR, promote its rapid internalization  
160 and subsequent lysosomal degradation. Thus, RAB5A may perturb EGFR cellular distribution by

161 enhancing its internalization, trafficking and degradation. If this were the case removal of EGF or  
162 inhibition of its kinase activity should restore EGFR surface and intracellular distribution to levels  
163 seen in control cells. We verified this prediction by IF analysis (Fig. 2E-G), and by determining the  
164 number of EGFR molecules on cell surface (Fig. 2H).

165 Intracellular accumulation of EGFR might be the results of elevated internalization or reduced  
166 recycling. In the former case, although clathrin-mediated endocytosis (CME) represents the best-  
167 characterized internalization route of EGFR into cells<sup>40</sup>, it can also occur through non-clathrin  
168 endocytosis (NCE), depending on growth conditions and cellular context<sup>41-44</sup>. At a low epidermal  
169 growth factor (EGF) dose (1 ng/ml), EGFRs are primarily internalized by CME and recycled back to  
170 the plasma membrane (PM)<sup>43</sup>. For large physiological EGF concentrations (20 to 100 ng/ml), NCE  
171 is activated in parallel to CME. EGFRs entering via NCE (~40%) are predominantly trafficked to the  
172 lysosome for degradation<sup>43, 44</sup>. To test whether RAB5A expression influences any of these entry  
173 routes, we measured the rate of internalization of <sup>125</sup>I-EGF at low and high concentrations. RAB5A  
174 expression significantly increased the endocytic rate constant (Ke) at high (30 ng/ml), but not at low  
175 (1 ng/ml) EGF concentrations, suggesting a specific impact on NCE (Fig. 3A). Using a similar  
176 approach, we also measured recycling rates of EGFR, which were not significantly altered by  
177 elevation of RAB5A (Fig. 3B). Following doxycycline induction of RAB5A expression, we further  
178 monitored the total levels of EGFR, which were slowly, but progressively decreased over time  
179 consistently with the augmented NCE internalization into endocytic compartments (Fig. 3C).  
180 Collectively, these findings indicate that RAB5A promotes EGFR NCE internalization routes, likely  
181 leading to increased endosomal EGFR and, possibly, to the re-awakening of collective motion.

182

### 183 **Activation of endosomal ERK1/2 is a molecular route to unjamming via flocking**

184 EGFR signalling and trafficking are strictly interdependent<sup>45</sup>. For example, the detection of  
185 phosphorylated receptors and signalling adaptors in endosomes indicated that signalling is initiated



186 at the plasma membrane but continues in endosomes<sup>46-48</sup>. Albeit recent work challenged this  
187 concept<sup>49,50</sup>, quantitative high-resolution FRET microscopy demonstrated that phosphorylated EGFR  
188 can be packaged at constant mean amounts in endosomes, which were proposed to act as signalling  
189 quanta-like platforms<sup>51</sup>. As a consequence, altering the size and number of endosomes directly  
190 affected the amplitude and duration of EGFR signalling.

191 Hence, we tested whether any of the canonical EGFR downstream pathways is altered following  
192 RAB5A expression. We found that while phosphorylated AKT and p38 levels were not significantly  
193 altered in confluent cells, phosphorylated ERK1/2 was elevated and long lived in RAB5A (Fig 4 A-  
194 B), but not in RAB5B or C expressing cells (Fig. S2A-B). Notably, RAB5B and C were very  
195 inefficient in reawakening collective motion in jammed monolayers (Fig. S2C and Movie S5). We  
196 corroborated this finding by testing in situ, through IF, the levels of phosphorylated ERK1/2 in intact  
197 monolayers formed by mixing control and EGFP-H2B-RAB5A-expressing cells (Fig. 4C). ERK1/2  
198 has also been reported to be activated in a temporally distinct “two waves” fashion after wounding  
199 that propagate in epithelial sheet controlling collective motion<sup>52</sup>. We found that RAB5A-MCF10A  
200 cells, which display accelerated wound migration speed, display a robust increase in ERK1/2 wave  
201 amplitude (Fig. S2D). Pharmacological inhibition of the ERK1/2 using PD0325901 that targets the  
202 upstream MEK kinase<sup>53</sup>, abrogated flocking mode of locomotion of RAB5A-monolayers by reducing  
203  $v_{RMS}$ ,  $L_{corr}$  and  $L_{pers}$  to control levels (Fig. 4D and Movie S6). RAB5A-mediated elevation of ERK1/2  
204 (Fig. 4E) was inhibited by treatment of MCF10A with AG1478 or Dynasore, a small molecule  
205 impairing dynamin pinchase activity<sup>54</sup>. These treatments also impeded reawakening of collective  
206 motion in jammed epithelia (Fig. 1, Movie S2, Movie S7 and ref<sup>30</sup>). Similar results were also obtained  
207 by silencing the expression of Dynamin 2, the only dynamin isoform expressed in MCF10A (Fig.  
208 S3A and Movie S8). The sum of these findings indicates that RAB5A elevation specifically enhances  
209 endosomally-compartmentalized ERK1/2 signalling. To directly test this possibility, we generated  
210 FRET EKAREV-ERK1/2 sensor<sup>55</sup>, which was targeted to endosomes by appending to its C-terminus

211 the FYVE domain of SARA protein<sup>56</sup> (Fig. 4F). The FYVE-ERK1/2-EKAREV-FRET sensor was,  
212 indeed, found on EEA1-positive endosomes (Fig. 4G), which were increased in size and dimension  
213 following RAB5A expression<sup>30</sup>. Removal of EGF or treatment of cells with PD0325901, significantly  
214 impaired FRET efficiency validating the biological relevance of the sensor (Fig. 4H). More  
215 importantly, RAB5A-expressing cells displayed elevated endosomal ERK1/2 FRET efficiency as  
216 compared to control monolayers (Fig. 4H). We further showed that global (or plasma membrane  
217 associated) elevation of ERK1/2 phosphorylation brought about by the expression of a constitutively  
218 activated MEK-DD stably expressed in MCF10A was insufficient to reawaken motility in jammed  
219 monolayers (Fig. S3B-C and Movie S9), reinforcing the notion that ERK1/2 must be activated in  
220 endosome to promote unjamming. Notably, inhibition of the late endosomal ERK1/2 scaffold, MP1 or  
221 p14<sup>57,58</sup>, had no impact on RAB5A mediated ERK1/2 hyper-activation, nor on collective motion (Fig.  
222 S3D-F and Movie S10) suggesting that other, yet to be identified molecular determinants/scaffolds  
223 mediate early endosome compartmentalization of ERK1/2 signalling.

224 What are the molecular substrates that endosomal ERK1/2 activates to promote collective motion?  
225 RAB5A-expressing, unjammed monolayers move in a highly ballistic, directed fashion by extending  
226 cryptic and oriented lamellipodia<sup>59</sup> underneath neighbouring cells<sup>30</sup>. The latter structures are  
227 dependent on RAC1, which activates branched actin polymerization of the pentameric WAVE2  
228 complex<sup>60</sup>. The key component of this complex, WAVE2, a nucleation promoting factor, must be  
229 phosphorylated by ERK1/2 on multiple serine residues, among which S351 and S343, to be activated  
230 and to control protrusion initiation and speed<sup>61, 62</sup>. Consistent with the latter finding, using  
231 phosphospecific antibody, we found that RAB5A expression increased the phosphorylation of S351  
232 and of S343 of WAVE2 (Fig. 5A) in an ERK1/2, EGFR and Dynamin-dependent manner (Fig. 5B).  
233 Additionally, by monitoring the dynamics of cells mosaically-expressing EGFP-LifeAct, we found  
234 that pharmacological inhibition of ERK1/2 impaired the formation of cryptic lamellipodia (Fig. 5C  
235 and Movie S11). Thus, RAB5A promotes endosomal, EGFR-dependent ERK1/2 signalling leading

236 to hyper phosphorylation and activation of WAVE2, and the formation of persistent lamellipodia that  
237 contribute to reawakening of collective motion.

238

239 **RAB5A-mediated unjamming overcomes kinetic and proliferation arrest in terminally-**  
240 **differentiated mammary acini.**

241 To explore the biological consequence of RAB5A-induced endo-ERK1/2 axis in more relevant  
242 physiological 3D processes, we exploited the well-established ability of MCF10A cells to recapitulate  
243 mammary gland morphogenesis when grown in 3D on top of Matrigel plugs in Matrigel-containing  
244 media<sup>37</sup>. Under these conditions, cells generate filled spheroid that within 14-to-21 days undergo a  
245 full differentiation program, giving raise to apico-basally polarized (Fig. S4A), kinetically and  
246 proliferation-arrested hollow cysts<sup>37</sup>. We employed mCherry-H2B-expressing control and RAB5A-  
247 cells to monitor kinematics of differentiated cysts treated with doxycycline to induce transgene  
248 expression (Fig. 6A). Cells in control differentiated acini display a limited motility and were, as  
249 expected, locked in jammed, kinetically-arrested states. The expression of RAB5A reawakened  
250 motility by triggering a striking circular angular rotational mode of motion with cells within the cysts  
251 migrating in an apparent highly-coordinated fashion (Fig. 6B and Movie S12). We applied a custom  
252 PIV analysis to evaluate the tangential velocity field associated with the cellular motion, from which  
253 we extracted the relevant kinematic parameters, like the root mean square velocity  $v_{RMS}$  and the  
254 rotational order parameter  $\psi$  (see Methods). The latter, which can vary in the range  $[0, 1]$ , captures  
255 the uniformity of collective motion (see also Methods):  $\psi = 1$  corresponds to a rigidly rotating  
256 sphere while, in the absence of coordinated motion, one expects  $\psi \cong 0$ . Control acini display barely  
257 detectable  $v_{RMS}$ , while the order parameter  $\Psi$  was constantly below 0.2 (Fig. 6C and Movie S12-13).  
258 In RAB5A-expressing cysts, we observed a marked elevation of  $\psi$ , which reached value close to 1  
259 in correspondence of the largest values of  $v_{RMS}$ , reflecting the acquisition of collective angular  
260 motion (CAM) (Fig. 6C and Movies S12-S13). We exploited this finding to assess whether RAB5A-

261 induced reawakening of motility in 3D cysts was dependent on the same key determinants controlling  
262 2D locomotion using various inhibitors. Indeed, impairing EGFR activity, ERK1/2 phosphorylation  
263 and dynamin-endocytosis effectively reduced  $v_{RMS}$  and the order parameter to control levels (Fig. 6C-  
264 table and Movies S14). We further tested whether RAB5A promoted similar microscopic changes as  
265 the ones seen in 2D unjammed monolayers<sup>30</sup>. Specifically, we analysed the morphology and  
266 distribution of E-cadherin junction both by IF and phosphorylated ERK1/2. We observed that cells  
267 in RAB5A-cysts display straight and compact junctions and elevated phosphoERK1/2 (Fig. S4B).  
268 The junctional features likely account for the large scale, coordinated motility of RAB5A acini. We  
269 also noticed that the induction of the expression of RAB5A in the initial phase of cystogenesis  
270 reduced the number of acini, but the ones remaining were significantly larger in size (Fig. 6D and  
271 Movie S15), and did not undergo proliferation arrest, like control cysts do. Indeed, whereas in control  
272 acini we detected no Ki67-positive, proliferating cells after 14 days in overlaid cultures, a sizeable  
273 fraction of RAB5A cysts kept on proliferating under conditions in which the number of apoptotic  
274 cells was, instead, comparable to that of control acini (Fig. S4D). We investigated this phenotype  
275 further by adding doxycycline to induce the expression of RAB5A at the end of the morphogenetic  
276 process, when acini have ceased proliferation and motility to complete the differentiation program<sup>37</sup>.  
277 RAB5A expression reawakened not only cell motility (see above) but was also sufficient to overcome  
278 proliferation arrest (Fig. 6F), in a strict ERK1/2-dependent manner (Fig. 6F).

279 The ERK1/2-dependent re-awakening of collective motion and proliferation of terminal  
280 differentiated mammary glands has been associated with the initiation of a more complex program of  
281 branched morphogenesis that begins with the formation of multicellular buds<sup>63, 64</sup>. The latter process  
282 is thought to require in addition to specific growth factors, also the interaction of epithelial acini with  
283 the microenvironment and ECM components<sup>65-67</sup>. Collagen Type I, for example, has been used to  
284 increase mechanical tension and facilitate duct morphogenesis<sup>68, 69</sup>. Henceforth, we grew MCF10A  
285 cells overlaid on mixed matrigel:collagen (5:1) gels<sup>66, 70</sup>. Under these conditions, cells form fully

286 differentiated acini undistinguishable from those grown on Matrigel only (Fig. 6G). Addition of  
287 doxycycline to induce RAB5A expression, however, caused cysts to lose their spherical roundness,  
288 and promoted the formation of multicellular buds (Fig. 6G). Thus, RAB5A-dependent reawakening  
289 of cell motility occurs during 3D morphogenetic processes and enables to overcome proliferation  
290 arrest in fully differentiated epithelial cell assemblies.

291

292 **Endocytic unjamming promotes collective invasion in BC DCIS spheroids and in ex vivo BC**  
293 **foci**

294 The discovery that unjamming impacts on the collective motility and on the growth dynamics of  
295 normal epithelial 3D ensembles prompted us to assess whether these processes can be exploited by  
296 BC to enhance their collective motility and invasive dynamic behavior<sup>71</sup>. To this end, we generated  
297 doxycycline-inducible MCF10.DCIS.com cells. These cells are isogenic to MCF10A, express  
298 oncogenic T24-H-RAS, a relative rare mutation in human BC lesions, but were derived from  
299 multiple-passage, murine orthotopic xenografts and shown to recapitulate in vivo and in vitro the  
300 progression from DCIS to invasive carcinoma<sup>72</sup>. During the DCIS phase, they grow under intra-ductal  
301 confinement where extreme cell packing and density exert mechanical stress, suppress motility and  
302 tumour progression. Consistently, MCF10.DCIS.com cells are locked in jammed kinetically arrested  
303 state when plated at high confluency in 2D (Fig. S5A and ref.<sup>30</sup>). The expression of RAB5A promoted  
304 the reawakening of collective motion (Fig. S5A and Movie 16 and ref.<sup>30</sup>). It also accelerated directed  
305 motility of wounded monolayers, which instead of arresting after the opposing fronts collided, kept  
306 on flowing as collective streams, reminiscent of “a wound that never heals<sup>73</sup>” (Fig. 7A ad Movie 17).  
307 Biochemically, RAB5A expression decreased total EGFR levels, but robustly increased ERK1/2  
308 without affecting AKT or p38 (which was slightly reduced) phosphorylation, as seen in  
309 untransformed MCF10A cells (Fig. S5B).

310 In contrast with MCF10A, MCF10.DCIS.com cells form filled spheroids when grown in low  
311 attachment, or on top or embedded in 3D ECM matrix, and can generate invasive 3D outgrowth  
312 recapitulating DCIS-to-IDC conversion<sup>74</sup>. To test the impact of RAB5A-mediated unjamming on 3D  
313 growth dynamic and collective invasion of MCF10.DCIS.com, we generated mCherry-H2B control  
314 and RAB5A expressing cells, grew them as spheroids that were embedded in thick, native collagen  
315 type I to recapitulate the desmoplastic reactive environments of DCIS. After doxycycline addition,  
316 we monitored the spheroid kinematics. Whereas control cells display a slow, uncorrelated, disordered  
317 motion (Fig. 7B and Movie S18), RAB5A-MCF-10.DCIS.com cells acquired a striking CAM,  
318 displaying a remarkably large angular velocity  $\Omega$  (of the order of  $\sim 12$  rad/hr) and a strong persistence  
319 in the orientation of the instantaneous axis of rotation captured by the decay time of the orientational  
320 correlation function (the typical time interval over which the axis of rotation loses memory of its  
321 initial orientation), which is of the order of minutes in control, but  $> 24$ hr in RAB5A-MCF-  
322 10.DCIS.com spheroids (Fig. 7B). On top of this global rotational motion, a marked elevation of  
323 fluid-like motility of the cells is also observed. The characteristic time scale associated with this  
324 internal rearrangement dynamics is estimated by calculating the so-called overlap parameter  $Q$  (see  
325 Methods for details). Briefly,  $Q$  is a function of time that decays from 1 to 0 according to the number  
326 of nuclei that have been substantially displaced from their original position, when observed in a  
327 reference frame co-moving with the whole spheroid (Fig. 7B). The decay of  $Q$  does not depend on  
328 the rigid motion of the spheroid as a whole, but captures, instead, the "fluid-like" relative motion of  
329 the cells.

330 Endocytic reawakening of liquid-like CAM in 3D RAB5A-MCF-10.DCIS.com spheroids was  
331 dependent on EGFR activity, ERK1/2 phosphorylation, dynamin endocytosis and abrogated  
332 following inhibition of ARP2/3-mediated branched polymerization (Fig 7C-table and Movies S19).  
333 Furthermore, EM morphological analysis of control and RAB5A expressing monolayers, spheroids  
334 and orthotopically-injected tumours revealed that RAB5A induces junctional straightening and

335 increases cell-cell surface contact areas (Fig. 7D). Thus, similar cellular/biochemical processes  
336 driving 2D locomotion and 3D acini morphogenesis operate in controlling the dynamic behaviour of  
337 oncogenic epithelial ensembles.

338 Next, we explored the pathological consequence of endocytic-mediated, unjamming of oncogenic  
339 collectives. Using mixed EGFP-LifeAct and mCherry-H2B-expressing spheroids embedded into  
340 collagen type I matrix, we monitored their behaviour over longer time scale. We invariably observed  
341 that RAB5A promoted CAM, followed by the extension into the surrounding ECM of multicellular  
342 protrusion in the form of invasive buds and strands, suggesting that unjamming and collective  
343 invasion might be temporally coordinated and possibly coupled (Fig. 8A and Movie S20).

344 Collective invasion into native collagen type I, which, at the concentration used, form a very dense  
345 network of intricate fibres, can only occur following its remodelling. Consistently, Second Harmonic  
346 Generation (SHG) signals of two-photon illumination revealed that RAB5A-expressing spheroids  
347 extensively remodelled the fibrillary collagen, generating gaps and channels for collective invasion  
348 to occur (Fig. S5C and Fig. 8B). EGFR, ERK1/2, Dynasore, and ARP2/3 inhibitor of CAM prevented  
349 also collagen remodelling and the formation of invasive buds, suggesting that acquisition of  
350 unjamming in 3D promote collective invasion (Fig. 8B).

351 Finally, we tested the latter hypothesis in a closer to physio-pathological conditions using *ex vivo*  
352 organotypic tumour slices from DCIS injected into the mammary fat pad of immunocompromised  
353 mice. To this end, m-Cherry-H2B and EGFP-LifeAct-expressing-control and RAB5A-  
354 MCF10.DCIS.com were xenotransplanted into NSG mice. After 4 weeks, tumour masses were  
355 mechanically excised, and organotypic tissue slices were grown at the air-liquid interface (see  
356 methods and ref.<sup>75</sup>). Under such conditions, bulk tumour tissues remain viable for up to 2 weeks and,  
357 more importantly, their dynamic behaviour can be tracked over hours with high temporal resolution.  
358 Control and RAB5A-DCIS organotypic cultures were exposed to doxycycline to induce transgene  
359 expression and monitored by time lapse confocal microscopy. Whereas control tumours were largely

360 immobile (Fig. 8C and Movies S21), jammed and compacted, the expression of RAB5A induces  
361 reawakening of cell dynamics. Cells became highly motile and appeared to stream in a way that  
362 resembles currents in a river (Fig 8C and Movies S21). PIV analysis captured quantitatively the  
363 transition to collective locomotory mode (Movie S22).

364 We concluded that endocytic unjamming of kinetically arrested dense DCIS tumours is sufficient  
365 to instigate motility and to promote collective invasive behaviour.



366 **Discussion**

367 Here, we provide the first evidence for a novel molecular route to unjamming, which reinstates the  
368 possibility of multicellular rearrangements in otherwise immobile mature epithelia and densely-  
369 packed carcinoma. Biochemically, we showed that elevated NCE internalization of EGFR promotes  
370 its accumulation into endosomal vesicles, which become proficient signalling platforms for the  
371 prolonged and elevated activation of ERK1/2. Our data using an endosomal-FRET-ERK1/2 sensor  
372 is, to our knowledge, the first direct demonstration of the latter contention. These findings are also  
373 consistent with the notion that while ERK1/2 signalling initiates at the plasma membranes, it  
374 continues into endosomes impacting not only on signal intensity and duration but also on specificity<sup>45-</sup>  
375 <sup>48, 76</sup>. Accordingly, RAB5A-induced EGFR endosomal signalling promotes the hyper-  
376 phosphorylation of WAVE2 that, by controlling branched actin polymerization, contributes to the  
377 extension of oriented cryptic lamellipodia<sup>59</sup>. Physically, the latter protrusions exert increased traction  
378 forces<sup>30, 77</sup>, and enhance cell orientation, which is found to be the fundamental ingredient to obtain  
379 liquid states with large Vičsek-like polar alignment, a signature of flocking in jammed epithelia<sup>30-32</sup>.

380 It is likely that additional, not yet identified substrates are phosphorylated by endosomal ERK1/2.  
381 Indeed, reawakening of motility in jammed epithelia requires perturbations of different cellular and  
382 supra-cellular pathways and properties (including cell-cell adhesion, surface tension<sup>78</sup> and monolayer  
383 rigidity<sup>33</sup> for optimal long-range force transmission<sup>79</sup>, volume and density fluctuations<sup>31, 80</sup>), which  
384 are all required to initiate a mode of locomotion that combines large scale correlation length with  
385 increased local cell arrangement typical of fluidized RAB5A tissues. This notwithstanding, impairing  
386 protrusion extension impedes the emergence of persistent flocking motion and abrogates the re-  
387 awakening of motility, pointing to a major role of the protrusion extension mechanism in setting the  
388 local directionality of the flocking motion.

389

390 Our results also represent a step forward in addressing the physio-pathological relevance of tissue  
391 *unjamming*. In 3D morphogenetic assays of mammary gland morphogenesis, we showed that endo-  
392 ERK1/2-mediated unjamming not only promotes the acquisition of coordinated angular rotational  
393 mode of motion, but that it is sufficient to overcome differentiation-induced proliferation arrest.  
394 These latter two features combine with input arising from the presence of collagen type I in the  
395 substrate, which likely provides increased mechanical tension<sup>68-70, 81</sup>, to facilitate multicellular bud  
396 formation, a process marking the beginning of branching morphogenesis<sup>67</sup>. Indeed, local elevation of  
397 ERK1/2, promoting both re-entry into proliferation and collective motion, has been shown to mediate  
398 murine mammary gland branching morphogenesis<sup>63, 64</sup>, remarkably similar to what we observe in our  
399 *in vitro* 3D assays. Thus, we argue that the endocytic-dependent jamming transition molecularly  
400 described here might be a valuable framework to account for the initiation of complex morphogenetic  
401 processes.

402 Finally, we showed that Endo-ERK1/2-unjamming might also be sufficient to overcome the  
403 rigid, kinetically-silent state of packed epithelial carcinoma spheroids that grow confined and encased  
404 by a thick collagen type I matrix. Endocytic unjamming, here, leads to the acquisition of flocking  
405 fluid modes of motion, in which highly coordinated and collective rotational migration and local  
406 unjamming coexist, providing the first evidence that this transition occurs not only in 2D monolayers,  
407 but also in complex 3D environments. Re-awakening of collective motion, under these conditions, is  
408 accompanied by a dramatic remodelling of the ECM and by the extension of collective invasive buds  
409 and strands. This process recapitulates some aspects of the transition from DCIS, which grow under  
410 intra-ductal confinement where extreme cell packing and density exert mechanical stress, suppress  
411 motility and tumour progression, to invasive carcinoma, which disperse locally also through  
412 collective invasion<sup>82</sup>. We showed that RAB5A is elevated in various human breast cancer subtypes  
413 and its elevated expression correlates with reduced relapse free probability, supporting the notion that  
414 jamming transition might, indeed, be an additional mechanism to promote local collective invasion

415 of densely packed breast carcinoma. In this setting, RAB5A induction could be an alternate route to  
416 EGFR addiction in invasive breast carcinomas, independently of HER2 status.  
417

418 **Methods**

419 Methods and any associated accession codes and references are included after the references.

420

421 **Acknowledgments**

422 This work has been supported by: the Associazione Italiana per la Ricerca sul Cancro (AIRC) to GS  
423 (IG#18621), PPDF (IG#18988 and MCO 10.000); the Italian Ministry of University and Scientific  
424 Research (MIUR) to PPDF; the Italian Ministry of Health (RF-2013-02358446) to GS. Regione  
425 Lombardia and CARIPLO foundation (Project 2016-0998) to RC; Worldwide Cancer Research  
426 (WCR#16-1245) to SS. CM and FG are partially supported by fellowships from the University of  
427 Milan, EB from the FIRC-AIRC.

428

429

430 **Author contributions**

431 AP, CM, EF design and perform all the experiments and edited the manuscript, SC aid in generating  
432 cell lines and in the analysis of IF and kinematic studies, SB, SS and PPDF conceived internalization  
433 assays and interpreted trafficking results, GVB perform EM studies, EM, MG, and DP aided in all  
434 the imaging acquisition, FRET and PIV analysis, CT aided in analysis of RAB5A expression in BC,  
435 FG and RC analyzed all the kinematic data and developed pipeline for the analysis of 3D motility,  
436 edited the manuscript and conceived part of the study together with CM, GS conceived the whole  
437 study, wrote the manuscript and supervised the whole work.

438

439 **Competing financial interests**

440 The authors declare no competing financial interests.

441

442 **Data Availability Statement**

443 Codes used for the analysis are all indicated in the methods section. The authors declare that all data  
444 supporting the findings of this study are available within the paper and its supplementary information  
445 files and there no restriction on data availability.

446

Figure 1

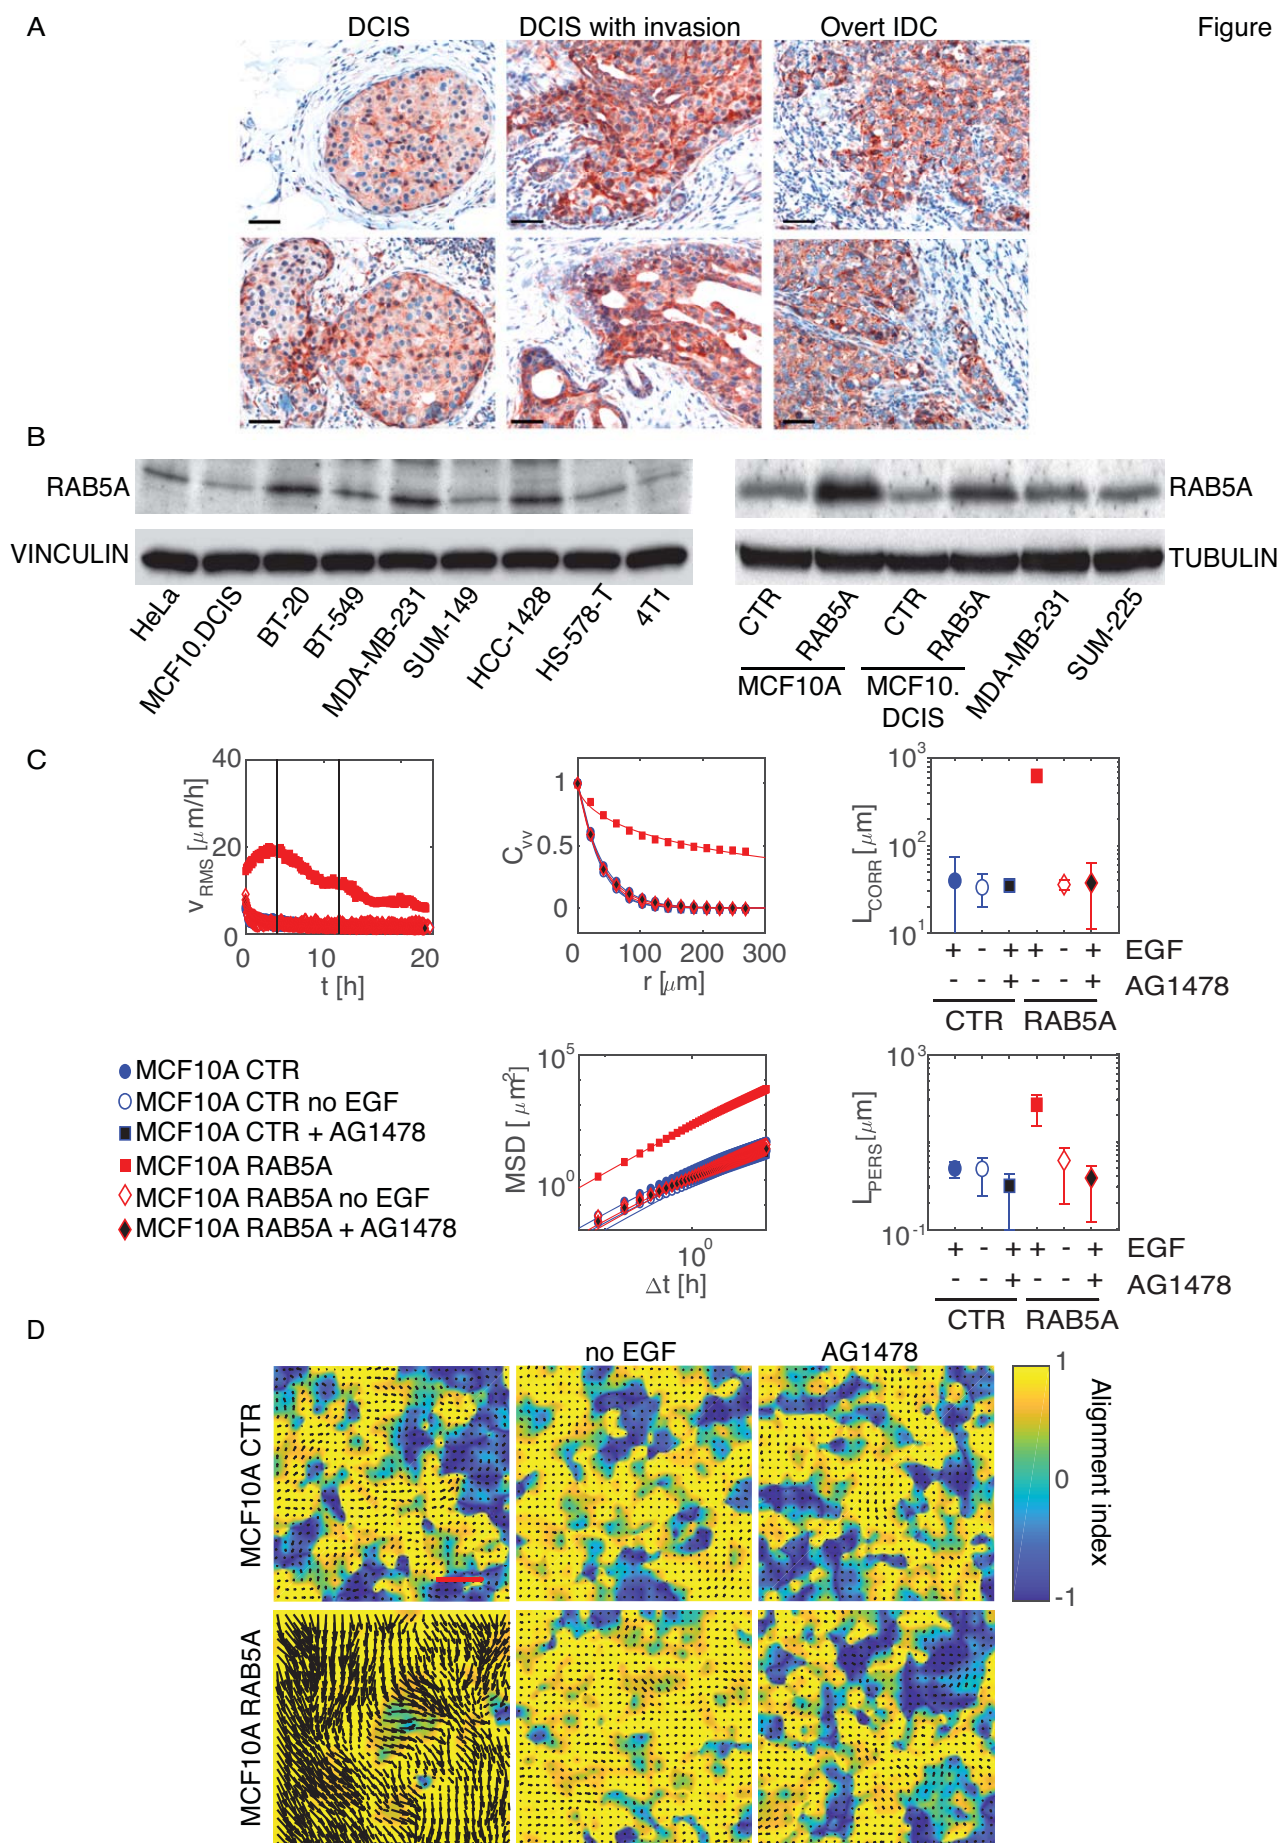

448 **Figure 1. Endocytic reawakening of motility is strictly dependent on EGFR activation**

449 **A.** Representative immunohistochemical staining of RAB5A on human ductal breast carcinoma in  
450 situ (DCIS) foci, DCIS with invasive components, and overtly infiltrative breast cancer foci showing  
451 the heterogeneous expression of RAB5A in DCIS foci and its increase in invasive areas. Scale bar,  
452 100  $\mu\text{m}$ . Please note the heterogenous and elevated expression of RAB5A in human IDC vs DCIS.

453 **B.** Doxycycline-treatment of MCF10A and MCF.DCIS.com engineered to express RAB5A in an  
454 inducible fashion increases the level of the protein, mimicking those found a variety of BC lines  
455 shown in the lower panels. Immunoblotting of total cell lysates with the indicated abs. Tubulin and  
456 Vinculin were used as loading control.

457 **C.** PIV analysis of motion of doxycycline-treated control and RAB5A-MCF10A cells seeded at a  
458 jamming density and monitored by time-lapse microscopy in the presence or the absence of EGF  
459 (Movie S1 and 3) or after treatment with the EGFR inhibitor AG1478 (Movie S2). Vertical lines  
460 indicate the time interval used for the analysis of the following motility parameters:  $v_{RMS} = \sqrt{\langle |\mathbf{v}|^2 \rangle}$ :  
461 root mean square velocity (representative of  $> 5$  independent experiments);  $C_{VV}$ : velocity correlation  
462 functions as function of the distance  $r$ . The correlation function is evaluated in the time window  
463 comprised between 4 and 12 h during which a peak in  $v_{RMS}$  is observed. In all cases,  $C_{VV}$  is well  
464 fitted to a stretched exponential decay, with stretching exponent  $\gamma$  decreasing from  $0.91 \pm 0.06$   
465 (control) to  $0.62 \pm 0.04$  (RAB5A).  $L_{corr}$ : correlation lengths whose width provide an estimate of the  
466 size of group of cells moving in coordinated fashion, which in RAB5A-expressing cells is close to  
467  $0.78 \pm 0.3$  mm, (corresponding to more than 50 cell diameter), whereas in control or after EGF-  
468 deprivation or treatment with AG1478 is around  $44 \pm 6$   $\mu\text{m}$  (1-to-2 cell diameter).  $MSD$ : mean square  
469 displacements obtained by numerical integration of the velocity maps over a given time interval,  $\Delta t$ .  
470 In all cases, for short times  $MSD$  displays a quadratic scaling  $MSD \cong (u_0 \Delta t)^2$ , which is indicative  
471 of a directed ballistic motion, although with dramatically different characteristic velocities ( $u_0 = 36$   
472  $\mu\text{m/h}$  for RAB5A,  $u_0 < 7$   $\mu\text{m/h}$  for the control or w/ o EGF or in the presence of AG1578). At later

473 times, a transition to a diffusive-like regime characterized by a scaling exponent close to 1 is  
474 observed. By fitting the MSD curves with a model function (continuous lines-see methods), we  
475 extracted an estimate of a persistence lengths,  $L_{pers}$ , which in RAB5A is around  $450 \pm 50$ , while in all  
476 other conditions is less than  $65 \pm 3.1$ .

477 Data were obtained by analysis of at least 5 movies/experimental conditions out of at least 4  
478 independent experiments.

479 **D.** Snapshots of the velocity field obtained from PIV analysis of doxycycline-treated control (Ctrl)  
480 and RAB5A-MCF-10A cells seeded at jamming density in the presence or the absence of EGF or  
481 treated with the EGFR inhibitor, AG1478, and monitored by time-lapse microscopy (Movie S4). The  
482 colour-map reflects the alignment with respect to the mean instantaneous velocity, quantified by the  
483 parameter  $a(x) = (\mathbf{v}(x) \cdot \mathbf{v}_0) / (|\mathbf{v}(x)| |\mathbf{v}_0|)$ .  $a = 1(-1)$ , the local velocity is parallel (antiparallel) to  
484 the mean direction of migration (not shown). Scale Bar, 100  $\mu\text{m}$ .



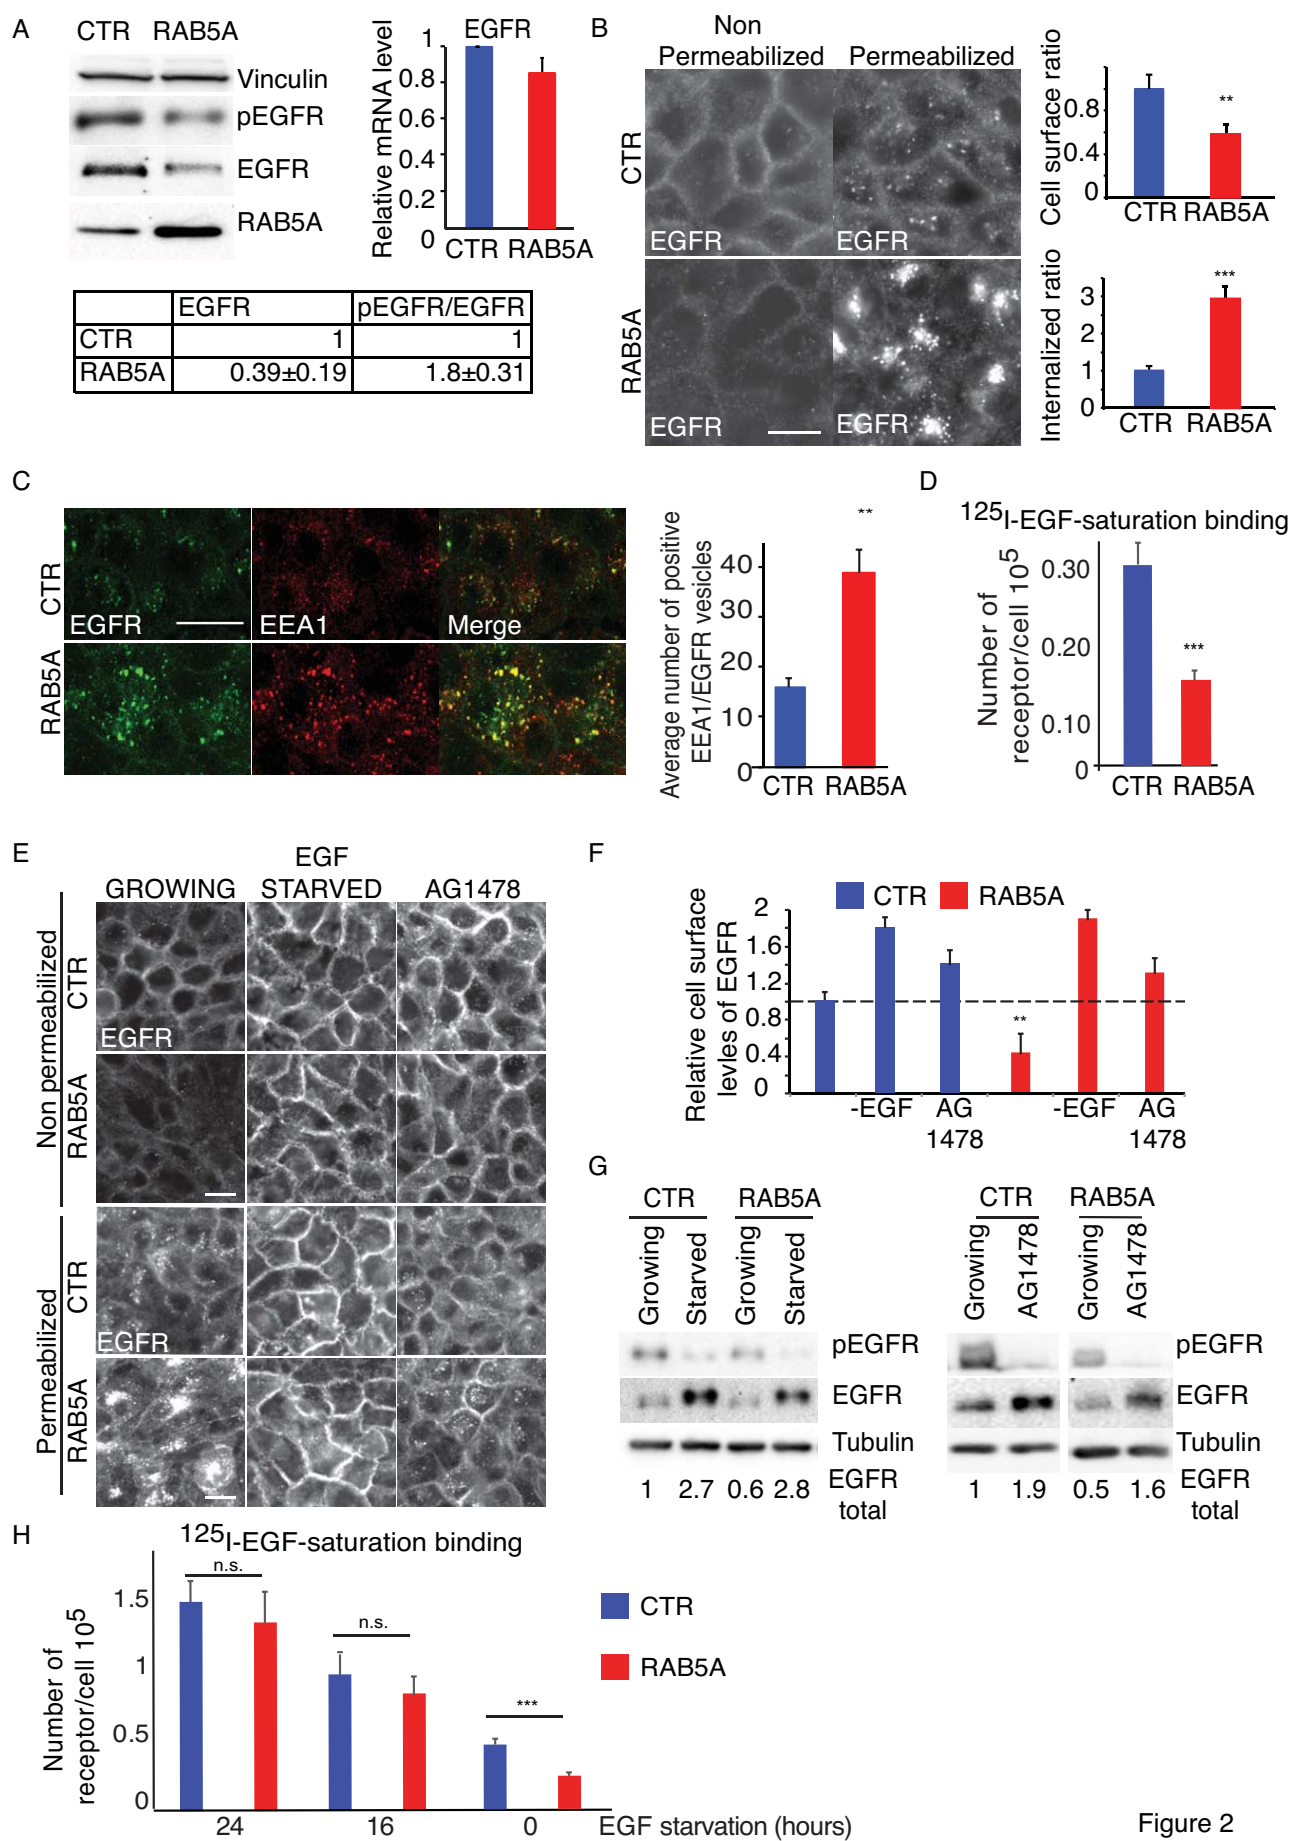

486 **Figure 2. RAB5A alters EGFR cellular distribution, trafficking and stability.**

487 **A.** Total cellular proteins (left) and EGFR mRNA levels (right) of control (CTR) and RAB5A-  
488 MCF10A seeded at jamming density and detected by immunoblotting or qRT-PCR, respectively. At  
489 the bottom, quantification of total EGFR and of the ratio of phosphorylated/total EGFR from the  
490 immunoblotting is shown. Data are the relative ratio (mean±SD, n=5 independent experiments) with  
491 respect to control, obtained after normalizing each intensity values to Vinculin. The levels of EGFR  
492 mRNA are expressed relative to control (mean±SD, n=5 independent experiments) after normalizing  
493 to GAPDH.

494 **B.** Control and RAB5A-MCF10A cells seeded at a jamming density were fixed and either  
495 permeabilized or non-permeabilized with 0.1% Triton X100 before staining with anti-EGFR ab. Data  
496 are the relative ratio (mean ± SD) with respect to control of total cell surface or internalized EGFR  
497 signals (n = 100 cells out of at least 3 independent experiments) normalized to cell number. Scale  
498 Bar, 20 µm. \*\*p< 0.01, \*\*\*p<0.005. *P* values were calculated using each-pair Student's t-test.

499 **C.** Representative images of control and RAB5A-MCF10A cells seeded at a jamming density, fixed  
500 and stained with the indicated abs. Data are the mean±SD of positive EEA1 and EGFR vesicles/cells  
501 (n>150 out of 3 independent experiments). \*\* p< 0.01, Student's t-test. Scale Bar, 20 µm

502 **D.** Number of EGFR/cell of control and RAB5-MCF10A seeded at jamming density measured by  
503 <sup>125</sup>I-EGF saturation binding after subtracting unspecific background counts (see methods for details).  
504 Data are the mean±SD of triplicate measurements of a representative experiment. \*\*\* p<0.005. *P*  
505 values were calculated using each-pair Student's *t* test.

506 **E-G.** Representative images (**E**) of control and RAB5A-MCF10A cells seeded at a jamming density,  
507 which were either deprived of EGF for 24 h or treated with AG1478 before fixation and staining as  
508 described in B. Scale Bar, 20 µm. Data (**F**) are the relative ratio (mean ± SD) with respect to control  
509 of total cell surface EGFR (n>120 cells in 2 independent experiments) normalized to cell number. \*\*  
510 p<0.05, each-pair Student's t-test versus control. Immunoblots (**G**) showing the efficacy of EGF

511 deprivation and EGFR inhibition on total and phosphorylated EGFR levels using the indicated abs.  
512 Each band of total EGFR was quantified and its mean intensity value is shown. The experiment is  
513 representative of at least 5 independent ones with similar outcome.

514 **H.** Number of EGFR/cell of control and RAB5-MCF10A seeded at jamming density measured by  
515 <sup>125</sup>I-EGF saturation binding after various time of EGF starvation as described in D. Data are the  
516 mean±SD of triplicate measurements of representatives experiments. \* p<0.05. *P* values were  
517 calculated using each-pair Student's t-test.

518

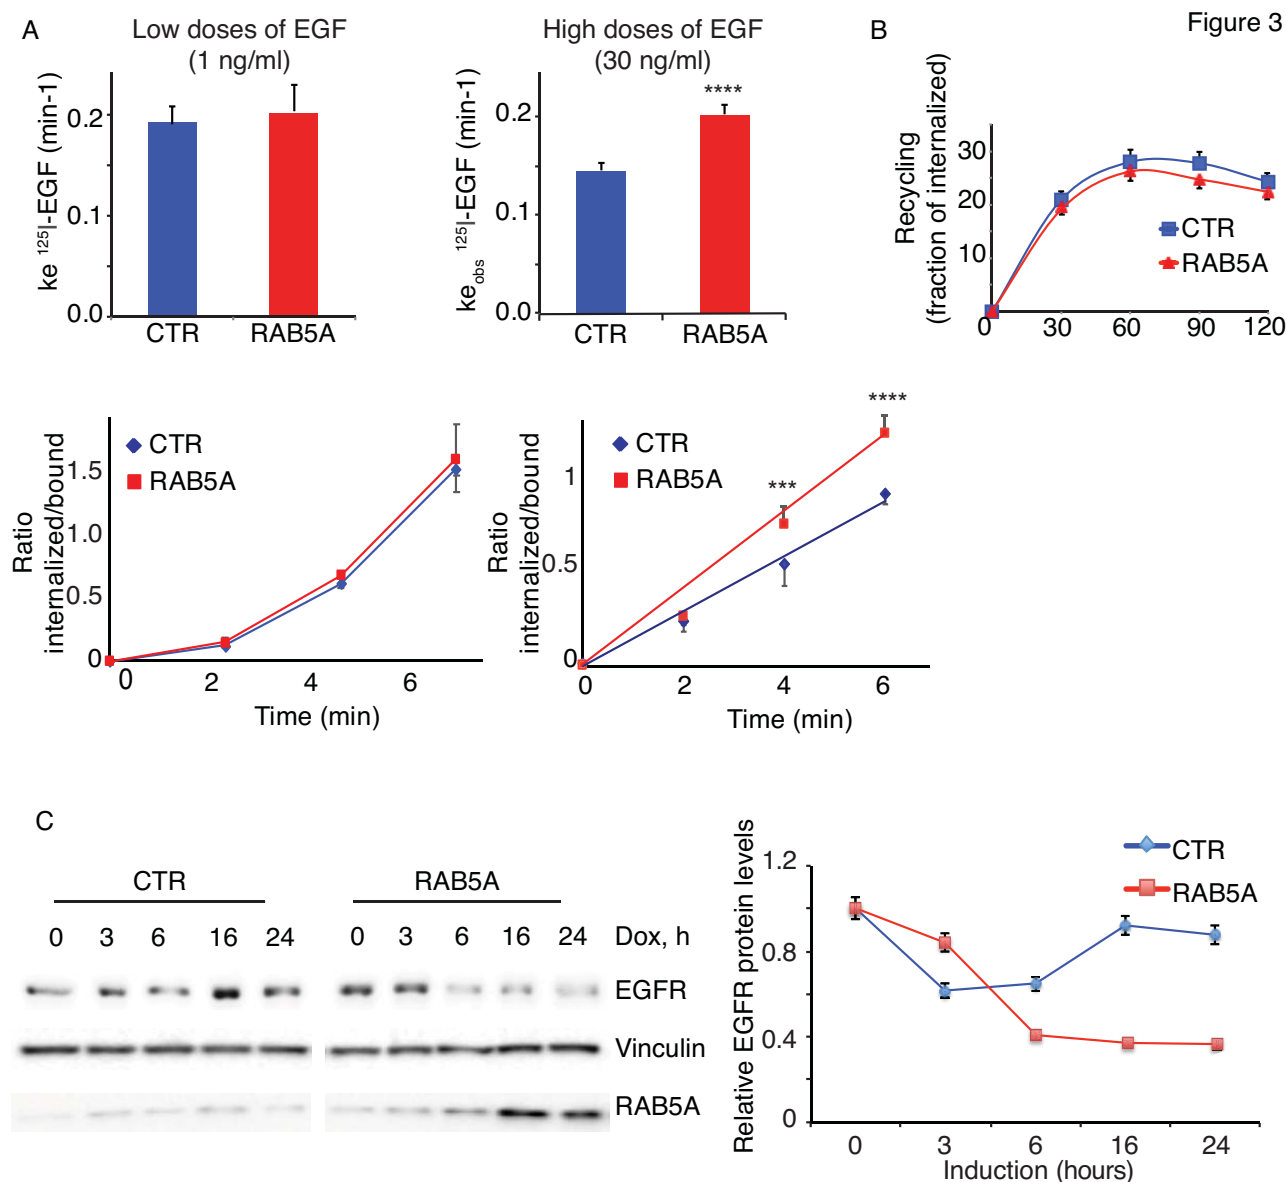

519

520 **Figure 3. RAB5A enhances internalization of EGFR at high doses of ligand.**

521 **A.** EGFR internalization kinetics in control and RAB5A-MCF10A cells seeded at jamming density  
 522 was measured using  $^{125}\text{I}$ -EGF at low (1 ng/ml) or high (30 ng/ml) concentrations. Results are  
 523 expressed as the effective or apparent internalization rate constants at low and high EGF doses,  
 524 respectively ( $K_e$ , upper panel). A representative kinetic of the ratio of  $^{125}\text{I}$ -EGF internalized/bound is  
 525 shown at different time points and is expressed as the mean $\pm$ SD (n=3 out of 5 independent  
 526 experiments). \*\*\*\*p < 0.0005. *P* values were calculated using each-pair Student's t-test.

527 **B.** Control or RAB5A-MCF10A cells seeded at jamming density were incubated with  $^{125}\text{I}$ -EGF (30  
528 ng/ml) for 15 min at 37 °C. Recycling of  $^{125}\text{I}$ -EGF at the indicated time points was estimated as  
529 described in Methods. Data are the mean  $\pm$  SD (n = 3 replicates in a representative experiment).

530 **C.** A representative kinetic of total EGFR levels as function of time after treatment with doxycycline  
531 in control or RAB5A-MCF10A cells. At the indicated time, total cellular lysates were immunoblotted  
532 with the indicated abs. The EGFR levels relative to control and normalized to Vinculin, used as loaded  
533 control are shown. Data are the mean $\pm$ SD (n=5 independent experiments). Representative blots are  
534 shown.

535

Figure 4

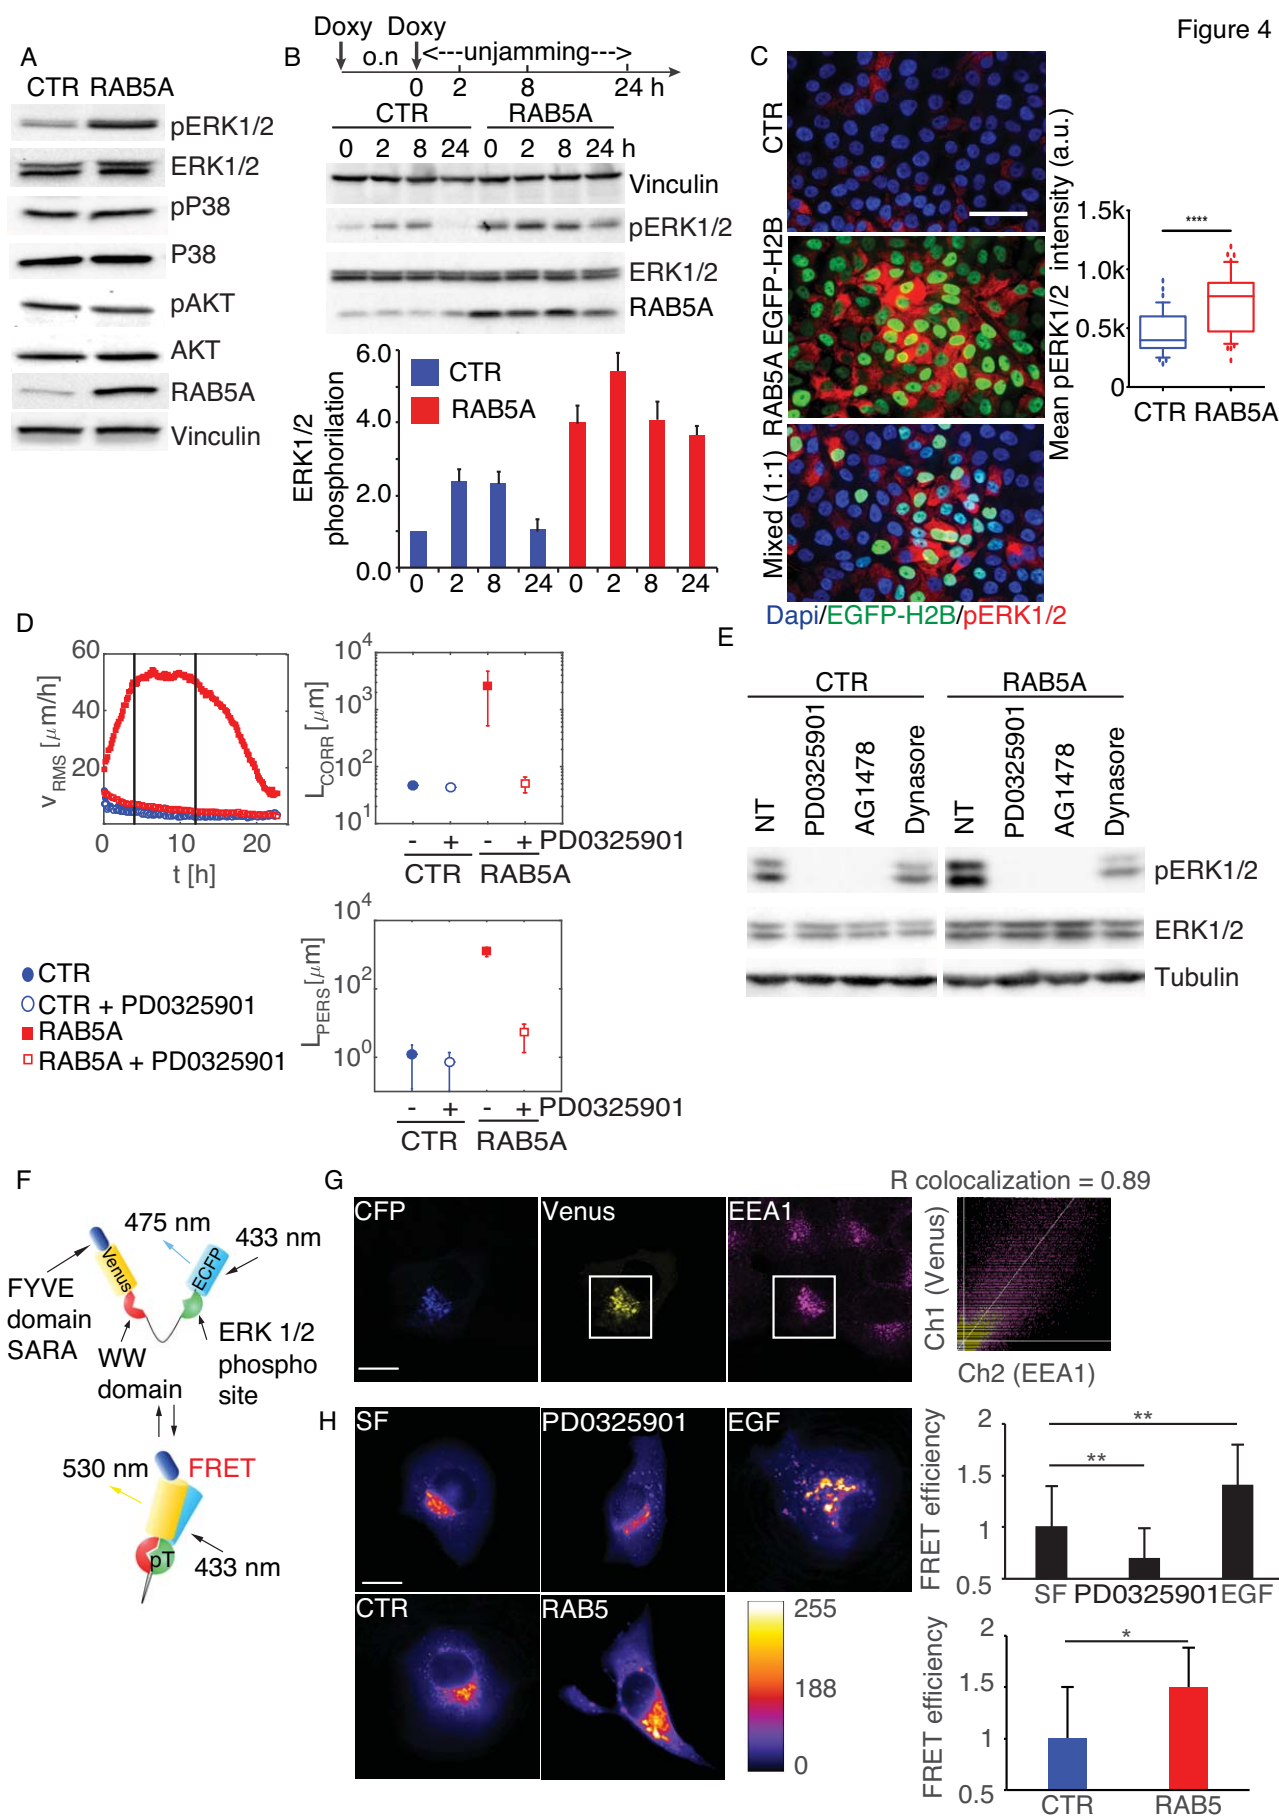

537 **Figure 4. RAB5A-induced, EGFR-dependent endosomal ERK1/2 activity is required for**  
538 **flocking locomotion in epithelial monolayer**

539 **A.** Total cellular lysates of control and RAB5A-MCF10A cells seeded at jamming density and treated  
540 with doxycycline for 16 h to induced RAB5A expression were immunoblotted with the indicated abs.

541 **B.** Total cellular lysates of control and RAB5A-MCF10A cells seeded at jamming density were  
542 treated with doxycycline overnight (o.n.). The morning after, the media was replenished and cells  
543 were either monitored by time lapse to follow their kinematics or lysed at various time point in order  
544 to follow the phosphorylation status by immunoblotting of ERK1/2, coincidentally with the  
545 expression of RAB5A and the reawakening of locomotion (not shown), as indicated in the  
546 experimental scheme reported above. The ratio of phosphoERK1/2/totalERK1/2 is plotted below and  
547 expressed as mean±SD (n=3 independent experiments).

548 **C.** Doxycycline-induced control and EGFP-H2B-RAB5A cells were seeded at jamming either alone  
549 or mixed at a 1:1 ratio (Mixed) fixed and stained against phosphorylated ERK1/2 or processed for  
550 epifluorescence. The mean±SD of the intensity of pERK1/2 is shown in the box plots (n=200 cells in  
551 at 3 independent experiments). Box and whisker: 10-90 percentiles. Outliers are plotted as bubbles  
552 and medias are horizontal lines in the boxes. \*\*\*\*p<0.0001. P value was calculated Student's t-test.  
553 Scale Bar, 50 µm.

554 **D.** Doxycycline-treated control and RAB5A-MCF10A cells seeded at jamming density were  
555 incubated with vehicle or PD0325901 (1 µM), a MEK inhibitor, 1 h before starting time-lapse  
556 recording (Movie S6). PIV analysis was applied to extract: root mean square velocity  $v_{RMS}$ , plotted  
557 as a function of time, correlation length  $L_{corr}$  and persistence length  $L_{pers}$ . Data are the mean±SD  
558 (n=5 movies/ conditions out of 3 independent experiments).

559 **E.** Total cellular lysate of doxycycline-treated control and RAB5A-MCF10A cells seeded at jamming  
560 density treated with PD0325901, or AG1478, or Dynasore (80 µg/ml) or vehicle as control were  
561 immunoblotted with the indicated abs. Data are representative of 4 experiments with similar outcome.



562 **F.** Scheme of the Endo-ERK1/2-FRET sensor. The FYVE domain of SARA protein is appended at  
563 the C-terminus of an EKAREV construct<sup>55</sup> carrying from C-terminus to the N-terminus: Venus, the  
564 domain binding WW phosphopeptide, a 72-Gly linker, a ERK1/2 Serine-containing substrate (sensor  
565 domain) and ECFP.

566 **G.** Endo-ERK1/2-FRET sensor localized into EEA1-positive early endosomes. Representative  
567 images of Endo-ERK1/2-FRET transfected MCF10A cells stained with anti-EEA1. The extent of  
568 colocalization between the Endo-ERK1/2-FRET sensor and EEA1 is shown on the right as Pearson  
569 Correlation coefficient. Scale Bar, 20  $\mu\text{m}$

570 **H.** *Upper panels*, Endo-ERK1/2-FRET transfected control MCF10A cells were either serum starved  
571 (SF) for 24 h or treated with PD0325901 or incubated with EGF (20ng/ml), then fixed and processed  
572 for detection of FRET efficiency as described in methods. FRET efficiency normalized to control,  
573 serum free MCF10A cells are the mean $\pm$ SD (n=55 cells/experimental condition in three independent  
574 experiments). *Bottom panels*, Endo-ERK1/2-FRET transfected control or RAB5A-MCF10A cells  
575 were processed for epifluorescence as described above. FRET efficiency normalized to the value of  
576 control cells is expressed as mean $\pm$ SD (n=75 cells/experimental condition in 3 independent  
577 experiments). Scale Bar, 20  $\mu\text{m}$

578 \*p<0.05, \*\* p<0.01. P value were calculated using Student's t-test.

579



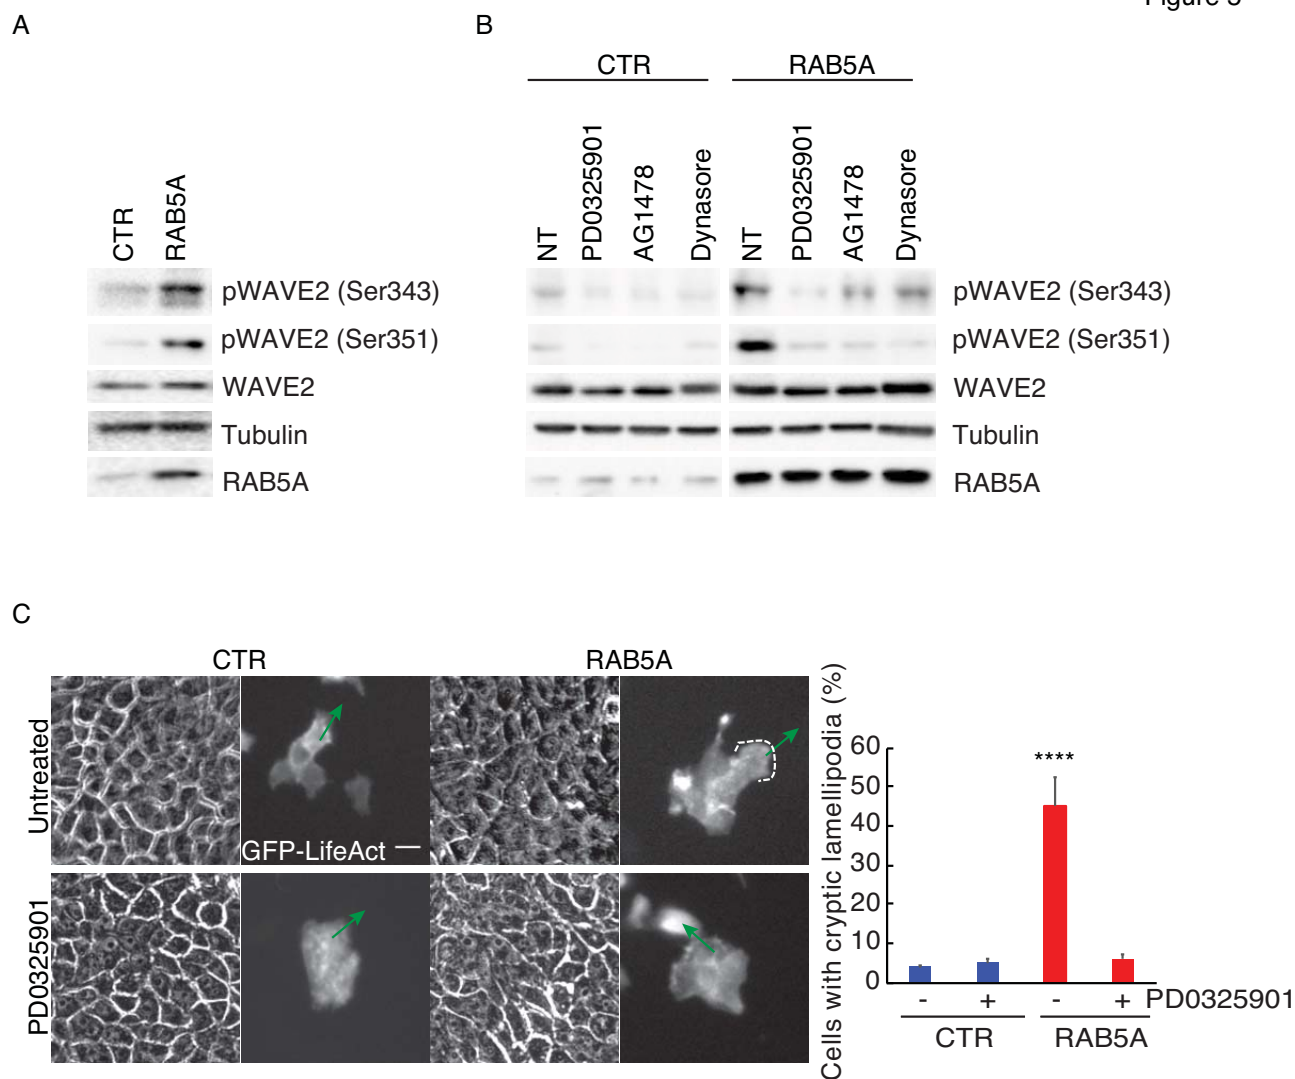

580

581 **Figure 5. Endosomal ERK1/2 activation leads to phosphorylation of WAVE2, which is required**  
 582 **for cryptic lamellipodia extension**

583 **A-B.** Total cellular lysate of doxycycline-treated control and RAB5A-MCF10A cells seeded at  
 584 jamming density (A) or treated (B) with either vehicle (NT) or with PD0325901, or AG1478, or  
 585 Dynasore were immunoblotted with the indicated abs.

586 **C.** Still phase-contrast and fluorescent images of cryptic lamellipodia in control and RAB5A-MCF-  
 587 10A monolayers composed of mosaically GFP-LifeAct-expressing (green):non-expressing cells  
 588 (1:10 ratio) monitored by time-lapse microscopy (Movie S11). Green arrows indicate the orientations  
 589 of protrusions. Scale bars, 20  $\mu$ m. Right plot: proportion of cells with lamellipodium. Data are the  
 590 mean $\pm$ SD. (n=65 cells/conditions from 4 independent experiments) \*\*\*\*p<0.0001, Student's t-test.

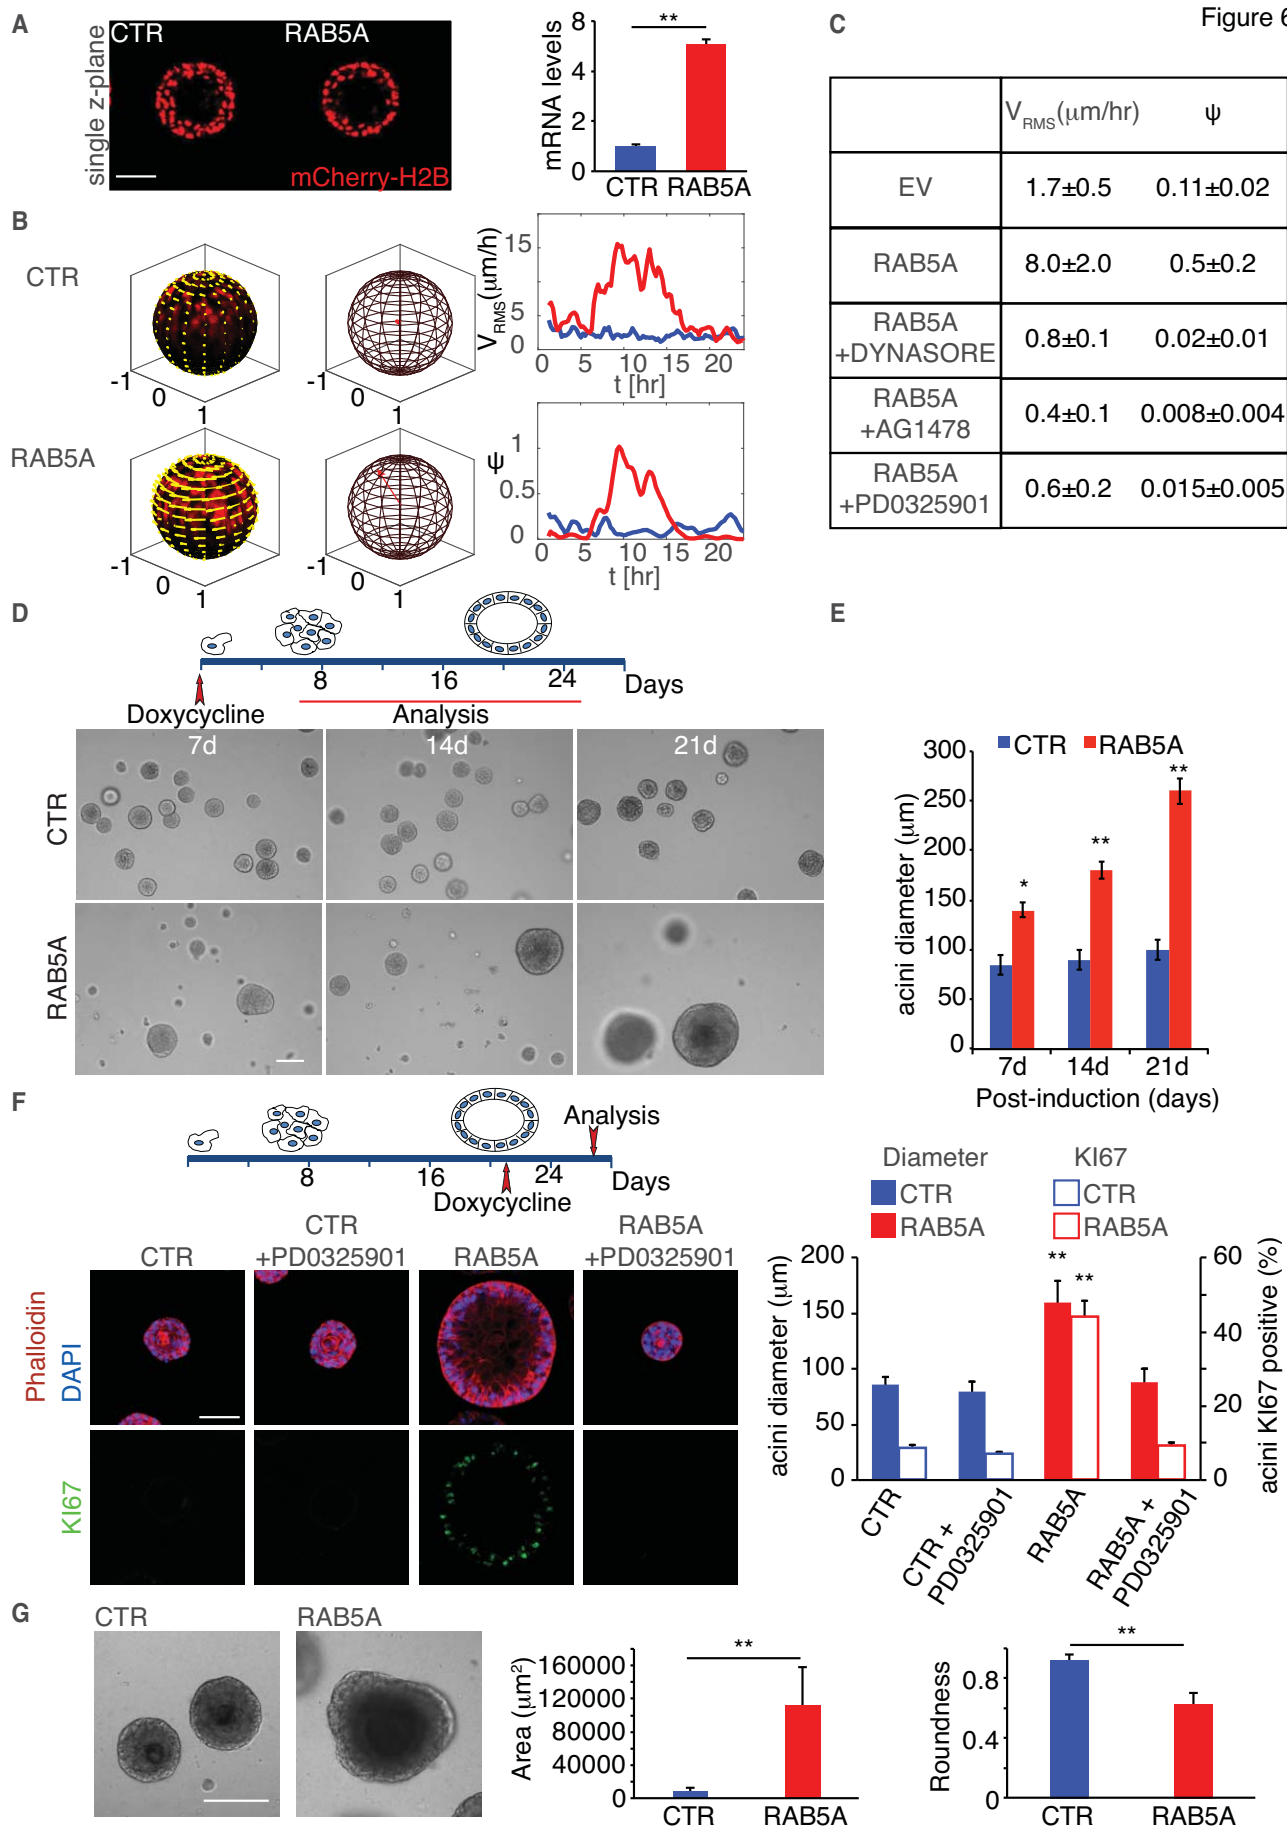

592 **Figure 6. RAB5A-mediated unjamming overcomes kinetic and proliferation arrest in terminal**  
593 **differentiated mammary acini.**

594 **A-B.** Control and RAB5A-MCF10A-expressing mCherry-H2B cells were grown overlaid on top of  
595 Matrigel plugs. Between 14 and 21 days, cells formed fully differentiated hollow acini. At this stage,  
596 Doxycycline was added and the kinematic of the 3D acini was monitored by confocal times lapse for  
597 24 h (Movies S12). Representative images of single Z planes are shown. RAB5A induction was  
598 verified by QRT-PCR, expressed relative to control after normalizing to GAPDH. The data are the  
599 relative level of gene expression compared to control expressed as mean  $\pm$  SD (n=3 independent  
600 experiments). Scale Bar, 50  $\mu$ m. In **B**, snapshots of the tangential velocity field at  $t = 10$  h (indicated  
601 by yellow arrows) obtained from PIV analysis are shown, overlaid on radial projection of the acini  
602 onto a unit spherical surface (see also Movies S13). The direction of the red arrow shown in the  
603 middle panel is parallel to the instantaneous total angular momentum  $\mathbf{l}$  and provides the orientation  
604 of the instantaneous axis of rotation, while its length is equal to the instantaneous order parameter  $\psi$ .  
605 On the right: time evolution of the root mean square velocity  $v_{RMS}$  and of the rotational order  
606 parameter  $\psi$  (see text and Methods for details). The data are representative of 4 movies in 3  
607 independent experiments.

608 **C.** Doxycycline-treated control and RAB5A-MCF-10A mcherry-H2B- expressing MCF10A acini  
609 were treated with the indicated vehicle or the indicated inhibitor and monitored by confocal time-  
610 lapse microscopy for 24 hr (Movie S14). Average values of  $v_{RMS}$  and of  $\psi$ , calculated over the time  
611 window comprised between 4 and 12 h, are reported. Values are from 5 movies form 3 independent  
612 experiments.

613 **D-E.** Doxycycline-treated control and RAB5A-MCF10A cells were grown overlaid on top of  
614 Matrigel plugs for up to 21 days. Acini were fixed and processed for phase contrast imaging to  
615 monitor acini shape and size (left images) or, at various time point, for immunofluorescence to detect  
616 apoptotic caspase+ and proliferating, Ki67+ cells (see Fig. S4). Exemplar, phase contrast images are

617 shown, (see also Movie S15). Scale Bar, 100  $\mu\text{m}$ . In (E), The average size of acini was quantified  
618 and expressed as mean $\pm$ SD (n=100 acini/conditions in 5 independent experiments. \*p<0.05, \*\*  
619 p<0.01. P value were calculated using each-pair Student's t-test.

620 **F.** Control and RAB5A-MCF10A cells were grown overlaid on top of Matrigel plugs for 14 days to  
621 allow full differentiation into hollow acini. Doxycycline was then added (time schedule of drug  
622 administration is on the top) to induce RAB5A expression in the presence or absence of PD0325901  
623 and after 6 days acini were fixed and stained as indicated. Scale Bar, 80  $\mu\text{m}$ . The size of acini was  
624 calculated by measuring their diameter. The number of KI67+ acini is also reported. Data are  
625 mean $\pm$ SD (n=25 acini/conditions in 3 independent experiments). \*\* p<0.01. P value were calculated  
626 using each-pair Student's t-test.

627 **G.** Doxycycline-treated control and RAB5A-MCF10A cells were grown overlaid on top of mixed  
628 Matrigel:Collagene Type I (1:1) plugs for 21 days. Acini were fixed and processed for phase contrast  
629 imaging to monitor acini shape and size (left images). Exemplar phase contrast images are shown.  
630 Scale bar, 100  $\mu\text{m}$ . Area of acini and acini roundness was quantified and expressed as mean $\pm$ SD  
631 (n=40 acini/conditions in 5 independent experiments). \*\* p<0.01, paired Student's t-test.

632

Figure 7

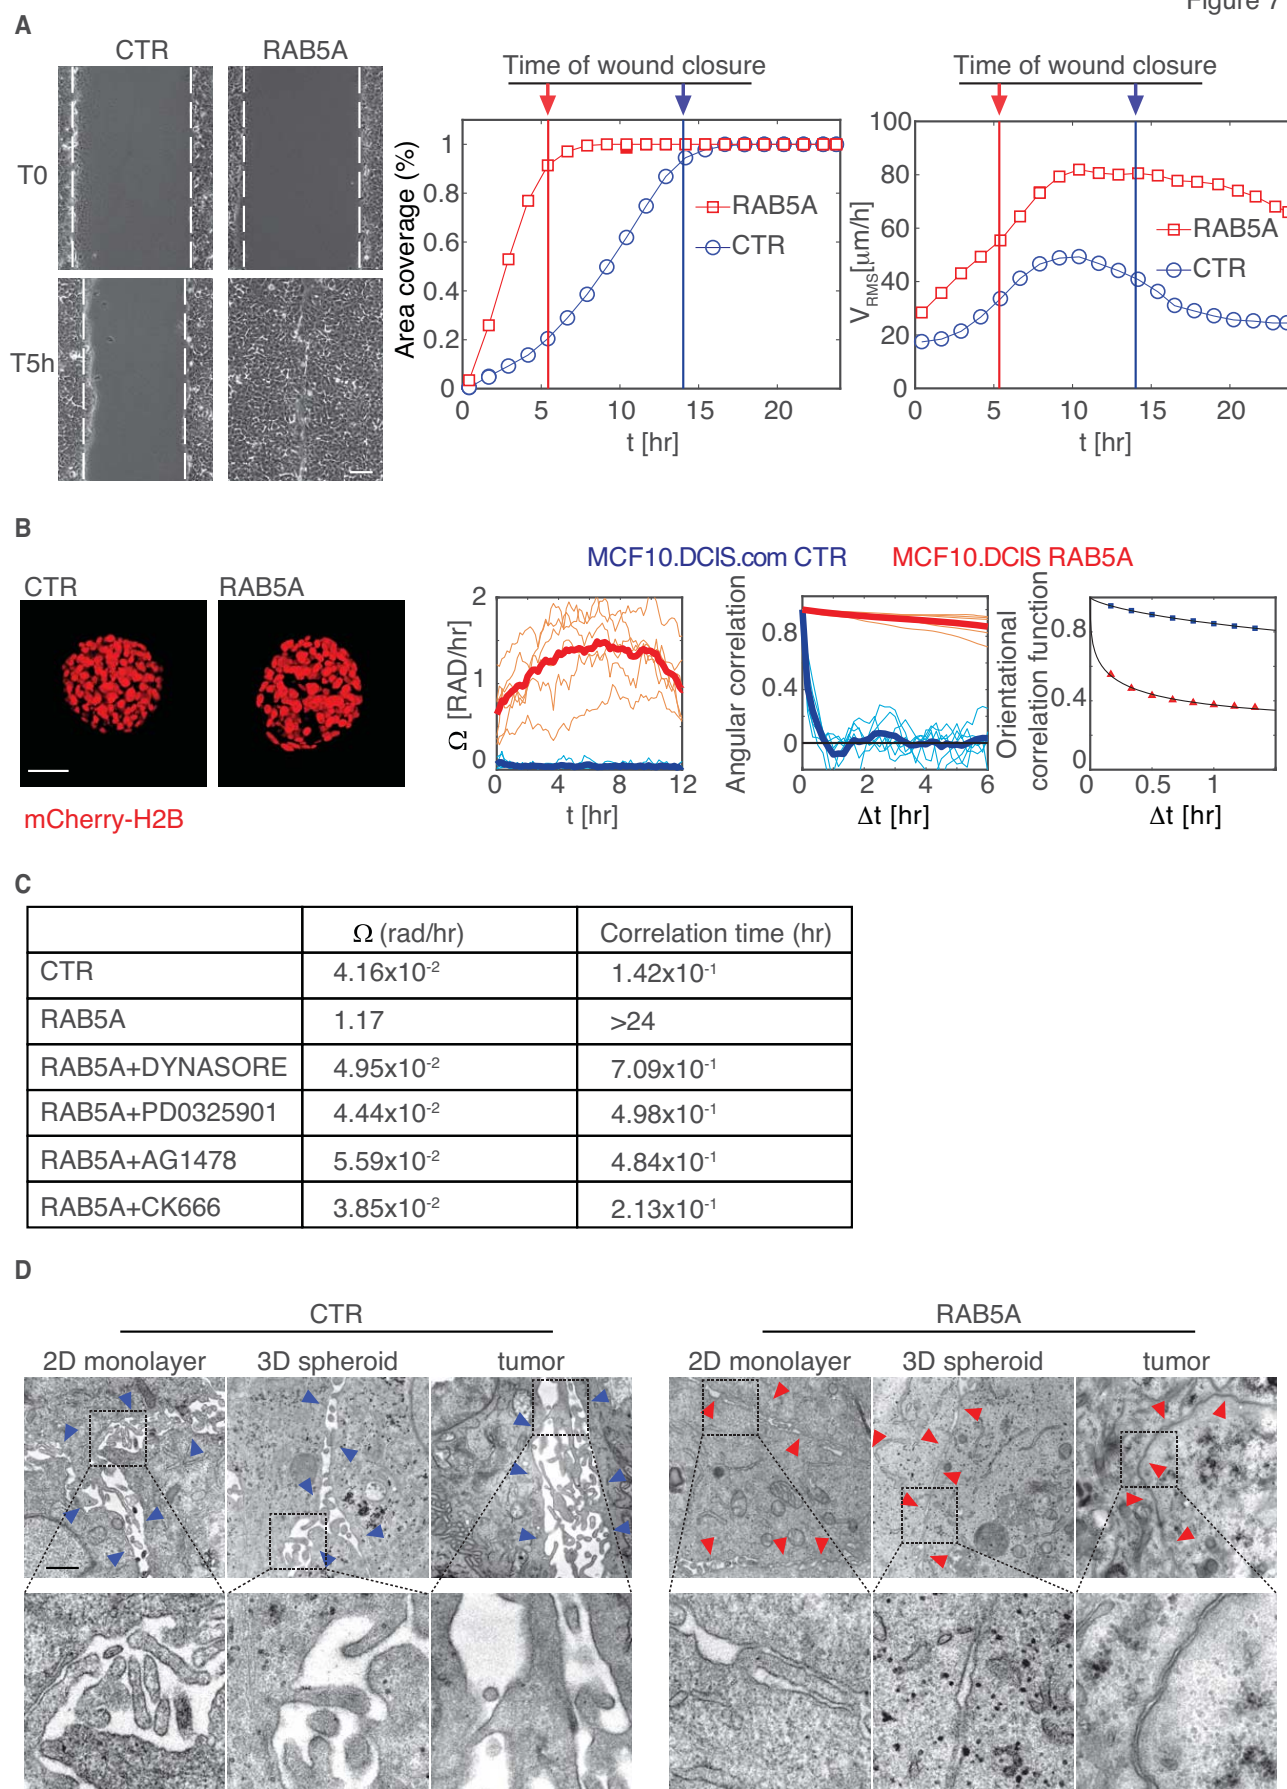



634 **Figure 7. RAB5A-mediated unjamming promotes the emergence of coordinated angular**  
635 **rotation mode of breast cancer spheroids**

636 **A.** Scratched wound migration of doxycycline-treated control and RAB5A-MCF10.DCIS.com  
637 seeded at jamming density. Representative still images at the indicated time points are shown. Dashed  
638 lines mark the wound edges. Scale bar, 100  $\mu\text{m}$ . Motility was quantified by measuring (left) the  
639 percentage of area covered over time (calculations made with MATLAB software). On the most  
640 righthand, we also quantified  $v_{RMS}$  as function of time using PIV, along the entire movies to reveal  
641 that while control cells ceased migration, RAB5A-MCF10.DCIS.com keep on flowing (see Movie  
642 S17). Vertical bars indicate the time at which wounds close. Data are representative of 1 experiment  
643 out of >10 that were performed with similar outcome.

644 **B.** Snapshots of control and RAB5A-MCF10.DCIS.com expressing mCherry-H2B that were grown  
645 as spheroids in low attachments plates. Spheroids were then embedded in thick 6.0 mg/ml of native  
646 Collagen Type I gels. After addition of doxycycline, the kinematic of spheroids was monitored by  
647 confocal time lapse microscopy (Movie S18). A variance-based analysis was performed to extract  
648 the angular velocity  $\Omega$  (expressed as rad/hr) of the spheroids as a function of time. The persistence of  
649 the rotational motion is quantified by considering the decay of the orientational correlation function,  
650 while the non-rigid part of the motion the spheroids, involving mutual cell rearrangement and fluid-  
651 like dynamics, is captured by the so-called overlap parameter  $Q$  (see Methods for details). The  
652 analysis was performed on 5-8 spheroid/conditions out of 3 independent experiments.

653 **C.** inematic parameters of doxycycline-treated control and RAB5A-MCF10.DCIS.com expressing  
654 mCherry-H2B spheroids under the experimental conditions described above but treated with vehicle  
655 or the various indicated inhibitors (Movie S19). Mean angular velocity  $\Omega$  and correlation time,  
656 extracted from an exponential fit of the orientational correlation functions, are reported (n=5  
657 spheroids/condition out of 3 independent experiments).

658 **D.** Representative electron microscopy micrographs of doxycycline-treated control and RAB5A-  
659 MCF10.DCIS.com cells that were seeded at jamming density as 2D monolayers, allowed to form 3D  
660 spheroids which were embedded into thick, native Collagen type I gels, or injected into the mammary  
661 fat pad of immune-compromised mice. Blue arrows point to large spaces between cell–cell contacts,  
662 red arrows to tight cell–cell contacts. Scale bars, 2  $\mu\text{m}$ .  
663

Figure 8

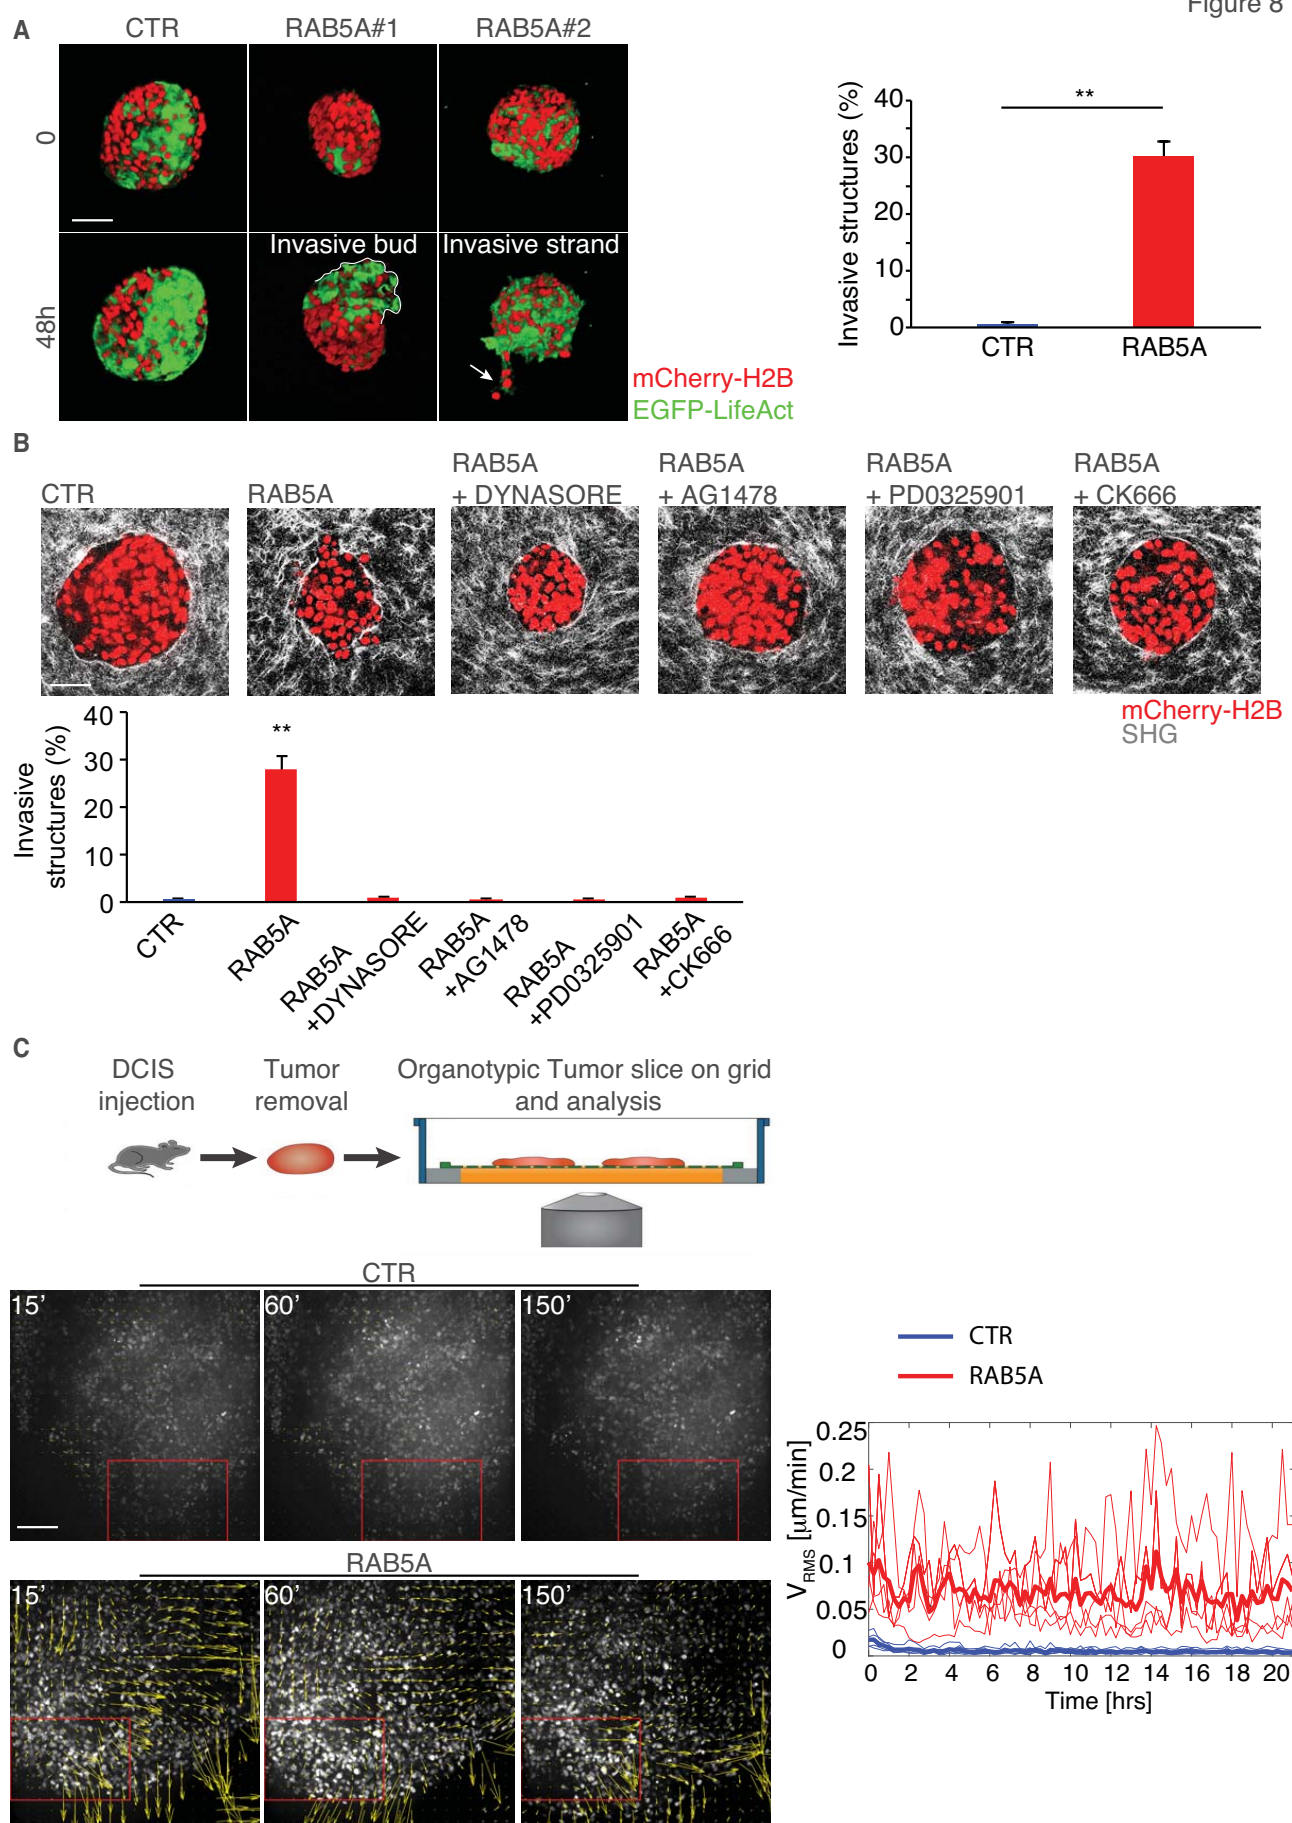



665 **Figure 8 RAB5A-mediated 3D unjamming promotes collective invasion in tumour spheroids**  
666 **and in ex vivo DCIS tumours slices**

667 **A.** Control and RAB5A-MCF10.DCIS.com expressing mCherry-H2B and EGFP-LifeAct were  
668 grown as spheroid in low attachment. Spheroids were then embedded in thick 6.0 mg/ml of native  
669 Collagen Type I gels. After addition of doxycycline, the kinematic of spheroids and the formation of  
670 invasive multicellular structures was monitored by confocal time lapse microscopy and snapshots are  
671 shown (Movie S20). The line delineates an invasive multicellular bud; the arrow points to an invasive  
672 strand. The percentage of spheroids with invasive multicellular structures was scored and expressed  
673 as mean±SD (n=15/experimental conditions in 5 independent experiments). \*\* p<0.01, calculated  
674 using Student's t-test. Scale Bar, 150 µm.

675 **B.** Analysis of Collagen type I structures using SHG of doxycycline-treated Control and RAB5A-  
676 MCF10.DCIS.com expressing mCherry-H2B spheroids embedded into 6.0 mg/ml of native Collagen  
677 Type I gels in the presence of vehicle or the indicated inhibitors. The percentage of spheroids with  
678 invasive multicellular structures was scored and expressed as mean±SD (n=15/experimental  
679 conditions in 5 independent experiments). \*\* p<0.01, calculated using each-pair Student's t-test.  
680 Scale Bar, 70 µm.

681 **C.** Schematic of the experimental design. Control and RAB5A-MCF10.DCIS.com expressing  
682 mCherry-H2B and EGFP-LifeAct cells ( $2 \times 10^5$ ) were injected into the mammary fat pad of  
683 immunocompromised mice. After 4 weeks, tumours that forms ductal carcinoma in situ lesion that  
684 are progression to become IDC were mechanically excised and tumour tissues slices were placed on  
685 a grid at the air-liquid interface. The organotypic cultures were treated with doxycycline and  
686 monitored by time-lapse confocal microscopy (Movie S21) for 24hr. Snapshots of the velocity fields  
687 obtained from PIV analysis of motion (Movie 22), which was used to extract the root mean square  
688 velocity,  $v_{RMS}$ , as function of time (Right plot). Boxed areas indicate representative fields of view used  
689 for the analysis (At least 5 field of view/movies of 3 independent experiments were analysed). Thin

690 lines in the right plot indicate the actual evolution of  $v_{RMS}$  in each of the field of view, while thick  
691 lines are the average of the  $v_{RMS}$ . Scale Bar, 150  $\mu$ m.

692

## 693 References

694

- 695 1. Friedl, P. & Gilmour, D. Collective cell migration in morphogenesis, regeneration and  
696 cancer. *Nat. Rev. Mol. Cell Biol.* **10**, 445-457 (2009).
- 697 2. Hakim, V. & Silberzan, P. Collective cell migration: a physics perspective. *Rep Prog Phys*  
698 **80**, 076601 (2017).
- 699 3. Friedl, P. & Mayor, R. Tuning Collective Cell Migration by Cell-Cell Junction Regulation.  
700 *Cold Spring Harbor perspectives in biology* **9** (2017).
- 701 4. Vedula, S.R., Ravasio, A., Lim, C.T. & Ladoux, B. Collective cell migration: a mechanistic  
702 perspective. *Physiology (Bethesda)* **28**, 370-379 (2013).
- 703 5. Labernadie, A. & Trepap, X. Sticking, steering, squeezing and shearing: cell movements  
704 driven by heterotypic mechanical forces. *Curr Opin Cell Biol* **54**, 57-65 (2018).
- 705 6. Park, J.A., Atia, L., Mitchel, J.A., Fredberg, J.J. & Butler, J.P. Collective migration and cell  
706 jamming in asthma, cancer and development. *J Cell Sci* **129**, 3375-3383 (2016).
- 707 7. Bi, D., Yang, X., Marchetti, M.C. & Manning, M.L. Motility-Driven Glass and Jamming  
708 Transitions in Biological Tissues. *Physical Review X* **6**, 021011 (2016).
- 709 8. Sadati, M., Taheri Qazvini, N., Krishnan, R., Park, C.Y. & Fredberg, J.J. Collective  
710 migration and cell jamming. *Differentiation; research in biological diversity* **86**, 121-125  
711 (2013).
- 712 9. Oswald, L., Grosser, S., Smith, D.M. & Kas, J.A. Jamming transitions in cancer. *J Phys D*  
713 *Appl Phys* **50**, 483001 (2017).
- 714 10. van Helvert, S., Storm, C. & Friedl, P. Mechanoreciprocity in cell migration. *Nat Cell Biol*  
715 **20**, 8-20 (2018).
- 716 11. Haeger, A., Krause, M., Wolf, K. & Friedl, P. Cell jamming: collective invasion of  
717 mesenchymal tumor cells imposed by tissue confinement. *Biochim Biophys Acta* **1840**,  
718 2386-2395 (2014).
- 719 12. Ye, X. & Weinberg, R.A. Epithelial-Mesenchymal Plasticity: A Central Regulator of Cancer  
720 Progression. *Trends Cell Biol* **25**, 675-686 (2015).
- 721 13. Nieto, M.A., Huang, R.Y., Jackson, R.A. & Thiery, J.P. EMT: 2016. *Cell* **166**, 21-45 (2016).
- 722 14. Friedl, P., Locker, J., Sahai, E. & Segall, J.E. Classifying collective cancer cell invasion.  
723 *Nature cell biology* **14**, 777-783 (2012).
- 724 15. Cheung, K.J. & Ewald, A.J. A collective route to metastasis: Seeding by tumor cell clusters.  
725 *Science* **352**, 167-169 (2016).
- 726 16. Cheung, K.J. *et al.* Polyclonal breast cancer metastases arise from collective dissemination  
727 of keratin 14-expressing tumor cell clusters. *Proc Natl Acad Sci U S A* **113**, E854-863  
728 (2016).
- 729 17. Cheung, K.J., Gabrielson, E., Werb, Z. & Ewald, A.J. Collective invasion in breast cancer  
730 requires a conserved basal epithelial program. *Cell* **155**, 1639-1651 (2013).
- 731 18. Aceto, N. *et al.* Circulating tumor cell clusters are oligoclonal precursors of breast cancer  
732 metastasis. *Cell* **158**, 1110-1122 (2014).
- 733 19. Khalil, A.A. *et al.* Collective invasion in ductal and lobular breast cancer associates with  
734 distant metastasis. *Clin Exp Metastasis* **34**, 421-429 (2017).

- 735 20. Clark, A.G. & Vignjevic, D.M. Modes of cancer cell invasion and the role of the  
736 microenvironment. *Curr Opin Cell Biol* **36**, 13-22 (2015).
- 737 21. Hosseini, H. *et al.* Early dissemination seeds metastasis in breast cancer. *Nature* (2016).
- 738 22. Harper, K.L. *et al.* Mechanism of early dissemination and metastasis in Her2+ mammary  
739 cancer. *Nature* (2016).
- 740 23. Scita, G. & Di Fiore, P.P. The endocytic matrix. *Nature* **463**, 464-473 (2010).
- 741 24. Sigismund, S. & Scita, G. The “endocytic matrix reloaded” and its impact on the plasticity  
742 of migratory strategies. *Curr Opin Cell Biol In Press* (2018).
- 743 25. Corallino, S., Malabarba, M.G., Zobel, M., Di Fiore, P.P. & Scita, G. Epithelial-to-  
744 Mesenchymal Plasticity Harnesses Endocytic Circuitries. *Frontiers in oncology* **5**, 45  
745 (2015).
- 746 26. Chepizhko, O. *et al.* From jamming to collective cell migration through a boundary induced  
747 transition. *Soft matter* (2018).
- 748 27. Chepizhko, O. *et al.* Bursts of activity in collective cell migration. *Proc Natl Acad Sci U S A*  
749 **113**, 11408-11413 (2016).
- 750 28. Palamidessi, A. *et al.* Endocytic trafficking of Rac is required for the spatial restriction of  
751 signaling in cell migration. *Cell* **134**, 135-147 (2008).
- 752 29. Frittoli, E. *et al.* A RAB5/RAB4 recycling circuitry induces a proteolytic invasive program  
753 and promotes tumor dissemination. *J Cell Biol* **206**, 307-328 (2014).
- 754 30. Malinverno, C. *et al.* Endocytic reawakening of motility in jammed epithelia. *Nature*  
755 *materials* **16**, 587-596 (2017).
- 756 31. Giavazzi, F. *et al.* Giant fluctuations and structural effects in a flocking epithelium. *Journal*  
757 *of Physics D: Applied Physics* **50**, 384003 (2017).
- 758 32. Giavazzi, F. *et al.* Flocking transitions in confluent tissues. *Soft matter* **14**, 3471-3477  
759 (2018).
- 760 33. Machesky, L.M. *et al.* Scar, a WASp-related protein, activates nucleation of actin filaments  
761 by the Arp2/3 complex. *Proc Natl Acad Sci U S A* **96**, 3739-3744 (1999).
- 762 34. Suetsugu, S., Miki, H. & Takenawa, T. Identification of two human WAVE/SCAR  
763 homologues as general actin regulatory molecules which associate with the Arp2/3 complex.  
764 *Biochem Biophys Res Commun* **260**, 296-302 (1999).
- 765 35. Yang, P.S. *et al.* Rab5A is associated with axillary lymph node metastasis in breast cancer  
766 patients. *Cancer Sci* **102**, 2172-2178 (2011).
- 767 36. Szabo, B. *et al.* Phase transition in the collective migration of tissue cells: experiment and  
768 model. *Phys Rev E Stat Nonlin Soft Matter Phys* **74**, 061908 (2006).
- 769 37. Debnath, J., Muthuswamy, S.K. & Brugge, J.S. Morphogenesis and oncogenesis of MCF-  
770 10A mammary epithelial acini grown in three-dimensional basement membrane cultures.  
771 *Methods* **30**, 256-268 (2003).
- 772 38. Levitzki, A. & Gazit, A. Tyrosine kinase inhibition: an approach to drug development.  
773 *Science* **267**, 1782-1788 (1995).
- 774 39. Zeigerer, A. *et al.* Rab5 is necessary for the biogenesis of the endolysosomal system in vivo.  
775 *Nature* **485**, 465-470 (2012).
- 776 40. Kirchhausen, T., Owen, D. & Harrison, S.C. Molecular structure, function, and dynamics of  
777 clathrin-mediated membrane traffic. *Cold Spring Harbor perspectives in biology* **6**, a016725  
778 (2014).
- 779 41. Boucrot, E. *et al.* Endophilin marks and controls a clathrin-independent endocytic pathway.  
780 *Nature* **517**, 460-465 (2015).
- 781 42. Orth, J.D., Krueger, E.W., Weller, S.G. & McNiven, M.A. A novel endocytic mechanism of  
782 epidermal growth factor receptor sequestration and internalization. *Cancer Res* **66**, 3603-  
783 3610 (2006).

- 784 43. Sigismund, S. *et al.* Clathrin-mediated internalization is essential for sustained EGFR  
785 signaling but dispensable for degradation. *Dev Cell* **15**, 209-219 (2008).
- 786 44. Caldieri, G. *et al.* Reticulon 3-dependent ER-PM contact sites control EGFR nonclathrin  
787 endocytosis. *Science* **356**, 617-624 (2017).
- 788 45. Sigismund, S. *et al.* Endocytosis and signaling: cell logistics shape the eukaryotic cell plan.  
789 *Physiol Rev* **92**, 273-366 (2012).
- 790 46. Di Guglielmo, G.M., Baass, P.C., Ou, W.J., Posner, B.I. & Bergeron, J.J.  
791 Compartmentalization of SHC, GRB2 and mSOS, and hyperphosphorylation of Raf-1 by  
792 EGF but not insulin in liver parenchyma. *EMBO J* **13**, 4269-4277 (1994).
- 793 47. Vieira, A.V., Lamaze, C. & Schmid, S.L. Control of EGF receptor signaling by clathrin-  
794 mediated endocytosis. *Science* **274**, 2086-2089 (1996).
- 795 48. McDonald, P.H. *et al.* Beta-arrestin 2: a receptor-regulated MAPK scaffold for the  
796 activation of JNK3. *Science* **290**, 1574-1577 (2000).
- 797 49. Sousa, L.P. *et al.* Suppression of EGFR endocytosis by dynamin depletion reveals that  
798 EGFR signaling occurs primarily at the plasma membrane. *Proc Natl Acad Sci U S A* **109**,  
799 4419-4424 (2012).
- 800 50. Brankatschk, B. *et al.* Regulation of the EGF transcriptional response by endocytic sorting.  
801 *Science signaling* **5**, ra21 (2012).
- 802 51. Villasenor, R., Nonaka, H., Del Conte-Zerial, P., Kalaidzidis, Y. & Zerial, M. Regulation of  
803 EGFR signal transduction by analogue-to-digital conversion in endosomes. *eLife* **4** (2015).
- 804 52. Matsubayashi, Y., Ebisuya, M., Honjoh, S. & Nishida, E. ERK activation propagates in  
805 epithelial cell sheets and regulates their migration during wound healing. *Curr Biol* **14**, 731-  
806 735 (2004).
- 807 53. Barrett, S.D. *et al.* The discovery of the benzhydroxamate MEK inhibitors CI-1040 and PD  
808 0325901. *Bioorg Med Chem Lett* **18**, 6501-6504 (2008).
- 809 54. Kirchhausen, T., Macia, E. & Pelish, H.E. Use of dynasore, the small molecule inhibitor of  
810 dynamin, in the regulation of endocytosis. *Methods Enzymol* **438**, 77-93 (2008).
- 811 55. Komatsu, N. *et al.* Development of an optimized backbone of FRET biosensors for kinases  
812 and GTPases. *Mol Biol Cell* **22**, 4647-4656 (2011).
- 813 56. Itoh, F. *et al.* The FYVE domain in Smad anchor for receptor activation (SARA) is  
814 sufficient for localization of SARA in early endosomes and regulates TGF-beta/Smad  
815 signalling. *Genes to cells : devoted to molecular & cellular mechanisms* **7**, 321-331 (2002).
- 816 57. Teis, D., Wunderlich, W. & Huber, L.A. Localization of the MP1-MAPK scaffold complex  
817 to endosomes is mediated by p14 and required for signal transduction. *Dev Cell* **3**, 803-814  
818 (2002).
- 819 58. Nada, S. *et al.* The novel lipid raft adaptor p18 controls endosome dynamics by anchoring  
820 the MEK-ERK pathway to late endosomes. *EMBO J* **28**, 477-489 (2009).
- 821 59. Farooqui, R. & Fenteany, G. Multiple rows of cells behind an epithelial wound edge extend  
822 cryptic lamellipodia to collectively drive cell-sheet movement. *J Cell Sci* **118**, 51-63 (2005).
- 823 60. Alekhina, O., Burstein, E. & Billadeau, D.D. Cellular functions of WASP family proteins at  
824 a glance. *J Cell Sci* **130**, 2235-2241 (2017).
- 825 61. Mendoza, M.C., Vilela, M., Juarez, J.E., Blenis, J. & Danuser, G. ERK reinforces actin  
826 polymerization to power persistent edge protrusion during motility. *Science signaling* **8**,  
827 ra47 (2015).
- 828 62. Mendoza, M.C. *et al.* ERK-MAPK drives lamellipodia protrusion by activating the WAVE2  
829 regulatory complex. *Mol Cell* **41**, 661-671 (2011).
- 830 63. Huebner, R.J., Neumann, N.M. & Ewald, A.J. Mammary epithelial tubes elongate through  
831 MAPK-dependent coordination of cell migration. *Development* **143**, 983-993 (2016).

- 832 64. Ewald, A.J., Brenot, A., Duong, M., Chan, B.S. & Werb, Z. Collective epithelial migration  
833 and cell rearrangements drive mammary branching morphogenesis. *Dev Cell* **14**, 570-581  
834 (2008).
- 835 65. Kim, H.Y. & Nelson, C.M. Extracellular matrix and cytoskeletal dynamics during branching  
836 morphogenesis. *Organogenesis* **8**, 56-64 (2012).
- 837 66. Carey, S.P., Martin, K.E. & Reinhart-King, C.A. Three-dimensional collagen matrix induces  
838 a mechanosensitive invasive epithelial phenotype. *Scientific reports* **7**, 42088 (2017).
- 839 67. Chuong, C.M., Bhat, R., Widelitz, R.B. & Bissell, M.J. SnapShot: Branching  
840 Morphogenesis. *Cell* **158**, 1212-1212 e1211 (2014).
- 841 68. Mailleux, A.A., Overholtzer, M. & Brugge, J.S. Lumen formation during mammary  
842 epithelial morphogenesis: insights from in vitro and in vivo models. *Cell Cycle* **7**, 57-62  
843 (2008).
- 844 69. Nguyen-Ngoc, K.V. *et al.* ECM microenvironment regulates collective migration and local  
845 dissemination in normal and malignant mammary epithelium. *Proc Natl Acad Sci U S A*  
846 **109**, E2595-2604 (2012).
- 847 70. Krause, S., Maffini, M.V., Soto, A.M. & Sonnenschein, C. A novel 3D in vitro culture  
848 model to study stromal-epithelial interactions in the mammary gland. *Tissue Eng Part C*  
849 *Methods* **14**, 261-271 (2008).
- 850 71. Pearson, G.W. & Hunter, T. PI-3 kinase activity is necessary for ERK1/2-induced disruption  
851 of mammary epithelial architecture. *Breast Cancer Res* **11**, R29 (2009).
- 852 72. Miller, F.R., Santner, S.J., Tait, L. & Dawson, P.J. MCF10DCIS.com xenograft model of  
853 human comedo ductal carcinoma in situ. *Journal of the National Cancer Institute* **92**, 1185-  
854 1186 (2000).
- 855 73. Dvorak, H.F. Tumors: wounds that do not heal. Similarities between tumor stroma  
856 generation and wound healing. *N Engl J Med* **315**, 1650-1659 (1986).
- 857 74. Hu, M. & Polyak, K. Molecular characterisation of the tumour microenvironment in breast  
858 cancer. *European journal of cancer* **44**, 2760-2765 (2008).
- 859 75. Staneva, R., Barbazan, J., Simon, A., Vignjevic, D.M. & Krndija, D. Cell Migration in  
860 Tissues: Explant Culture and Live Imaging. *Methods Mol Biol* **1749**, 163-173 (2018).
- 861 76. Di Fiore, P.P. & von Zastrow, M. Endocytosis, signaling, and beyond. *Cold Spring Harbor*  
862 *perspectives in biology* **6** (2014).
- 863 77. Das, T. *et al.* A molecular mechanotransduction pathway regulates collective migration of  
864 epithelial cells. *Nat Cell Biol* **17**, 276-287 (2015).
- 865 78. Park, J.A. *et al.* Unjamming and cell shape in the asthmatic airway epithelium. *Nature*  
866 *materials* **14**, 1040-1048 (2015).
- 867 79. Tambe, D.T. *et al.* Collective cell guidance by cooperative intercellular forces. *Nature*  
868 *materials* **10**, 469-475 (2011).
- 869 80. Zehnder, S.M., Suaris, M., Bellaire, M.M. & Angelini, T.E. Cell Volume Fluctuations in  
870 MDCK Monolayers. *Biophys J* **108**, 247-250 (2015).
- 871 81. Joraku, A., Sullivan, C.A., Yoo, J. & Atala, A. In-vitro reconstitution of three-dimensional  
872 human salivary gland tissue structures. *Differentiation; research in biological diversity* **75**,  
873 318-324 (2007).
- 874 82. Dang, T.T., Esparza, M.A., Maine, E.A., Westcott, J.M. & Pearson, G.W. DeltaNp63alpha  
875 Promotes Breast Cancer Cell Motility through the Selective Activation of Components of  
876 the Epithelial-to-Mesenchymal Transition Program. *Cancer Res* **75**, 3925-3935 (2015).
- 877
- 878



879 **METHODS**

880

881 **Plasmids, antibodies and reagents.**

882 Doxycycline-inducible lentiviral vectors pSLIK-neomycin (neo) carrying RAB5A or RAB5C  
883 sequences and pSLIK-hygromycin (hygro) carrying RAB5B sequence were obtained by Gateway  
884 Technology (Invitrogen), following the manufacturer's protocol. The plasmids pBABE-puromycin  
885 (puro)-mCHERRY-H2B and pBABE- puro-EGFP-H2B were provided by IFOM-Imaging Facility.  
886 The lentiviral expression construct pRRL-Lifeact-EGFP-puromycin (puro) was a gift of Olivier Pertz  
887 (University of Basel, Basel, Switzerland). pBabe-Puro-MEK-S218D/S222D (MEK-DD) vector was  
888 purchased from Addgene.

889 FRET EKAREV-ERK1/2 sensor<sup>1</sup> was generated by cloning synthesized FYVE domain of SARA into  
890 the BamHI/EcoRI cleaved EKAREV-FRET vector to generate pPBsr2-3560NES-EKAREV-FRET  
891 new vector.

892 Mouse monoclonal antibodies raised against  $\alpha$ -tubulin (#T5168) or vinculin (#V9131) were from  
893 Sigma-Aldrich. Rabbit polyclonal anti-RAB5A (S-19, #sc-309) and goat polyclonal anti-EEA-1 (N-  
894 19, #sc-6415) antibodies from Santa Cruz Biotechnology. Monoclonal rabbit anti-human RAB5A -  
895 ab109534, dilution 1:100, (Abcam[EPR5438]) was used of IHC;Rabbit polyclonal anti-Giantin  
896 (#PRB-114C) antibody was from Covance. Mouse monoclonal anti-human Ki-67 Antigen (MIB-1,  
897 #M7240) antibody was from Dako. Mouse monoclonal anti-AP50 (AP2mu) (31/AP50, #611350) was  
898 from BD Bioscience. Mouse monoclonal anti-E-cadherin (#610181) antibody was from Transduction  
899 Lab. Rabbit polyclonal anti-phospho-EGFR (Tyr1086, #2220), rabbit monoclonal anti-phospho-  
900 p44/42 MAPK (ERK1/2) (Thr202/Tyr204, #4370), rabbit polyclonal anti-p44/42 MAPK (ERK1/2)  
901 (#9102), rabbit monoclonal anti-phospho-p38 MAPK (Thr180/Tyr182, 3D7, #9215), mouse  
902 monoclonal anti-p38 MAPK (L53F8, #9228), rabbit monoclonal anti-phospho-AKT (Ser473,  
903 193H12, #4058), rabbit polyclonal anti-AKT (#9272), rabbit polyclonal anti-MEK1/2 (#9122) and  
904 rabbit polyclonal anti-cleaved Caspase-3 (Asp175, #9661) antibodies were from Cell Signalling

905 Technology. Rabbit polyclonal anti-phospho-WAVE2 (Ser343, #07-1512), rabbit polyclonal anti-  
906 phospho-WAVE2 (Ser351, #07-1514) and mouse monoclonal anti-Laminin-V (P3H9-2,  
907 #MAB1947) antibodies were from Merck/Millipore. Mouse monoclonal anti-WAVE2 antibody was  
908 homemade. Rabbit polyclonal anti EGFR (806), directed against aa 1172-1186 of human EGFR  
909 (ImmunoBlot) and mouse monoclonal anti-EGFR (m108 hybridoma) directed against the  
910 extracellular domain of human EGFR (IF) were a gift from P.P. Di Fiore. Secondary antibodies  
911 conjugated to horseradish peroxidase were from Bio-Rad (#7074, #7076); Cy3-secondary antibodies  
912 from Jackson ImmunoResearch (#711-165-152, #715-165-150); DAPI (#D-1306) and AlexaFluor  
913 488 (A-11055, A-21202) were from Thermo Fisher Scientific. TRITC- (#P1951) and FITC- (#P5282)  
914 conjugated phalloidin were from Sigma Aldrich.

915 Doxycycline Hyclate (DOX, #D9891), Dynasore Hydrate (#D7693), AG1478 (#T4182) and CK666  
916 (#SML0006) were from Sigma Aldrich. PD0325901 (#444966) was from Merck/Millipore.

917

#### 918 **Cell cultures and transfection.**

919 MCF10A cells were a kind gift of J. S. Brugge (Department of Cell Biology, Harvard Medical School,  
920 Boston, USA) and were maintained in Dulbecco's Modified Eagle Medium: Nutrient Mixture F-12  
921 (DMEM/F12) medium (Biowest) supplemented with 5% horse serum, 1% L-Glutamine (EuroClone),  
922 0.5 mg ml<sup>-1</sup> hydrocortisone (Sigma-Aldrich), 100 ng ml<sup>-1</sup> cholera toxin (Sigma-Aldrich),  
923 10 µg ml<sup>-1</sup> insulin (Sigma-Aldrich) and 20 ng ml<sup>-1</sup> EGF (Vinci Biochem). MCF10.DCIS.com cells  
924 were kindly provided by J. F. Marshall (Barts Cancer Institute, Queen Mary University of London,  
925 UK) and maintained in Dulbecco's Modified Eagle Medium: Nutrient Mixture F-12 (DMEM/F12)  
926 medium supplemented with 5% horse serum, 1% L-Glutamine, 0.5 mg ml<sup>-1</sup> hydrocortisone,  
927 10 µg ml<sup>-1</sup> insulin and 20 ng ml<sup>-1</sup> EGF. All cell lines have been authenticated by cell fingerprinting  
928 and tested for mycoplasma contamination. Cells were grown at 37 °C in humidified atmosphere with  
929 5% CO<sub>2</sub>. MCF10A cells were infected with pSLIK-neo-EV (empty vector-CTR), pSLIK-neo-

930 RAB5A, pSLIK-hygro-RAB5B or pSLIK-neo-RAB5C lentiviruses and selected with the appropriate  
931 antibiotic to obtain stable inducible cell lines. MCF10.DCIS.com were infected with pSLIK-neo-EV  
932 (empty vector-CTR) or pSLIK-neo-RAB5A lentiviruses and selected with the appropriate antibiotic  
933 to obtain stable inducible cell lines. Constitutive expression of EGFP-LifeAct- or mCHERRY- or  
934 EGFP-H2B was achieved by lentiviral and retroviral infection of MCF10A and MCF10DCIS.com  
935 cells with EGFP-LifeAct- puro or pBABE- puro-mCHERRY-H2B/ pBABE- puro-EGFP-H2B  
936 vectors, respectively.

937 Transfections were performed using either calcium phosphate or FUGENE HD Transfection reagent  
938 (#E2311, PROMEGA) reagents, according to manufacturer's instructions. FUGENE HD reagent was  
939 used for FRET-EKAREV-ERK1/2 transfection in MCF10A cells.

940

#### 941 **Generation of lentiviral and retroviral particles**

942 Packaging of lentiviruses or retroviruses was performed following standard protocols. Viral  
943 supernatants were collected and filtered through 0.45  $\mu\text{m}$  filters. Cells were subjected to four cycles  
944 of infection and selected using the appropriate antibiotic: neomycin for pSLIK-neo vector (150  
945  $\mu\text{g}/\text{ml}$ ), hygromycin for pSLIK-hygro vector (100  $\mu\text{g}/\text{ml}$ ) or puromycin for EGFP-LifeAct or pBABE  
946 vectors (2  $\mu\text{g}/\text{ml}$ ). After several passages, stable bulk populations were selected and induced by  
947 Doxycycline Hyclate (2.5  $\mu\text{g}/\text{ml}$ ) in order to test: i) induction efficiency by Western Blotting and  
948 quantitative RT-PCR (qRT-PCR), and ii) the homogeneity of the cell pool by immunofluorescence  
949 staining, as previously shown<sup>2</sup>.

950

#### 951 **RNA interference**

952 siRNAs (small interfering RNAs) delivery was achieved by mixing 1 nM of specific siRNAs with  
953 Optimem and Lipofectamine RNAiMAX Transfection Reagent (Life Technologies). The first cycle  
954 of interference (reverse transfection) was performed on cells in suspension. The day after, a second



955 cycle of interference (forward transfection) was performed on cells in adhesion. The following  
956 siRNAs were used for knocking down specific genes. All sequences are 5' to 3'.

957 Dynamin2 (DNM2): 5'-GACATGATCCTGCAGTTCA-3' (Dharmacon)

958 AP2mu: 5'-UGACCCGAAAGGCAUCCACCCCC-3' (Riboxx)

959 MP1 (LAMTOR3): 5'-CAAUUUAAUCGUUUACCUU-3' (Silencer Select, Ambion)

960 P14 (LAMTOR2): 5'-CCCAAGUGGCGGCAUCUUA-3' (Silencer Select, Ambion)

961 Reticulon 3 (RTN3): 5'-CCCUGAAACUCAUUAUUCGUCUCUU-3' (Stealth, Invitrogen)

962 Reticulon 4 (RTN4): 5'-CCAGCCUAUCCUGCUGCUUUCAUU-3' (Stealth, Invitrogen)

963 For each RNA interference experiment, negative control was performed with the same amount of  
964 scrambled siRNAs. Silencing efficiency was controlled by qRT-PCR.

965

#### 966 **Quantitative RT-PCR analysis**

967 Quantitative RT-PCR analysis was performed as previously shown<sup>2</sup>. Total RNA was extracted using  
968 RNeasy Mini kit (Qiagen) and quantified by NanoDrop to assess both concentration and quality of  
969 the samples. Reverse transcription was performed using SuperScript VILO cDNA Synthesis kit from  
970 Invitrogen. Gene expression was analyzed using TaqMan Gene expression Assay (Applied  
971 Biosystems). 0.1 ng of cDNA was amplified, in triplicate, in a reaction volume of 25  $\mu$ l with 10 pMol  
972 of each gene- specific primer and the SYBR-green PCR MasterMix (Applied Biosystems). Real-time  
973 PCR was performed on the 14 ABI/Prism 7700 Sequence Detector System (PerkinElmer/Applied  
974 Biosystems), using a pre-PCR step of 10 min at 95°C, followed by 40 cycles of 15 s at 95°C and 60  
975 s at 60°C. Specificity of the amplified products was confirmed by melting curve analysis  
976 (Dissociation Curve TM; PerkinElmer/Applied Biosystems) and by 6% PAGE. Preparations with  
977 RNA template without reverse transcription were used as negative controls. Samples were amplified  
978 with primers for each gene (for details see the Q-PCR primer list below) and GAPDH as a  
979 housekeeping gene. The Ct values were normalized to the GAPDH curve. PCR experiments were

980 performed in triplicate and standard deviations calculated and displayed as error bars. Primer assay  
981 IDs were: GAPDH, Hs99999905\_m1; RAB5A, Hs00702360\_s1; RAB5B, Hs00161184\_m1 and  
982 RAB5C, Hs00428044\_m1, Dynamin2 (DNM2) Hs00974698\_m1, MP1 (LAMTOR3)  
983 Hs00179753\_m1, P14 (LAMTOR2) Hs00203981\_m1, Reticulon3 (RTN3) Hs01581965\_m1,  
984 Reticulon4 (RTN4) Hs01103689\_m1.

985

### 986 **Immunoblotting**

987 For protein extraction, cells, previously washed with cold PBS, were lysed in JS buffer supplemented  
988 with proteases and phosphatases inhibitors [50 mM HEPES PH 7.5, 50 mM NaCl, 1% glycerol; 1%  
989 Triton X-100, 1.5 mM MgCl<sub>2</sub>. 5 mM EGTA plus protease inhibitor cocktail (Roche, Basel,  
990 Switzerland), 1 mM DTT, 20 mM Na pyrophosphate pH 7.5, 50 mM NaF, 0.5 M Na-vanadate in  
991 HEPES pH 7.5 to inhibit phosphatases]. Lysates were incubated on ice for 10 minutes and cleared by  
992 centrifugation at 13,000 rpm for 30 min at 4°C. Protein concentration was quantified by Bradford  
993 colorimetric protein assay. The same amount of protein lysates was loaded onto polyacrylamide gel  
994 in 5X SDS sample buffer. Proteins were transferred onto Protran Nitrocellulose Transfer membrane  
995 (Whatman), probed with the appropriate antibodies and visualized with ECL western blotting  
996 detection reagents (GE Healthcare). Membrane blocking and incubation in primary or secondary  
997 antibodies were performed for 1h in TBS/0.1% Tween/5% milk for antibodies recognizing the total  
998 proteins or in TBS/0.1% Tween/5% BSA for antibodies recognizing phosphorylated proteins.

999

### 1000 **Immunohistochemistry on DCIS and IDC**

1001 Sections from archival human breast cancer samples were collected from the archives of the Tumor  
1002 Immunology Laboratory of the Human Pathology Section, Department of Health Sciences,  
1003 University of Palermo, Italy.

1004 Immunohistochemistry was performed using a polymer detection method (Novolink Polymer  
1005 Detection Systems Novocastra, Leica Biosystems, Newcastle, Product No: RE7280-K).  
1006 Tissue samples were fixed in 10% buffered formalin and embedded in paraffin. Four-micrometers-  
1007 thick tissue sections were dewaxed and rehydrated. The antigen unmasking technique was performed  
1008 using Novocastra Epitope Retrieval Solution pH6 citrate-based buffer in thermostatic water bath at  
1009 98°C for 30 minutes. Subsequently, the sections were brought to room temperature and washed in  
1010 PBS-Tween. After neutralization of the endogenous peroxidase with 3% H<sub>2</sub>O<sub>2</sub> and protein blocking  
1011 by a specific protein block, the samples were incubated 1h with monoclonal rabbit anti-human  
1012 RAB5A [EPR5438] - ab109534 (dilution 1:100, Abcam). Staining was revealed by polymer detection  
1013 kit (Novocastra, Ltd) and AEC (3-Amino-9-Ethylcarbazole) substrate chromogen. The slides were  
1014 counterstained with Harris hematoxylin (Novocastra, Ltd). All the sections were analyzed under a  
1015 Zeiss Axio Scope A1 optical microscope (Zeiss, Germany) and microphotographs were collected  
1016 using an Axiocam 503 Color digital camera with the ZEN2 imaging software (Zeiss Germany)

1017

### 1018 **Cell streaming and wound healing assays**

1019 As previously shown<sup>2</sup>, cells were seeded in 6-well plate (1.5\*10<sup>6</sup> cells/well) in complete medium and  
1020 cultured until a uniform monolayer had formed. RAB5A expression was induced, were indicated, 16  
1021 hours before performing the experiment by adding fresh complete media supplemented with 2.5  
1022 µg/ml Doxycycline Hyclate to cells. Comparable cell confluence was tested by taking pictures by  
1023 differential interference contrast (DIC) imaging using a 10x objective and counting the number of  
1024 nuclei/field. In cell streaming assay, medium has been refreshed before starting imaging. In wound  
1025 healing assay, cells monolayer was scratched with a pipette tip and carefully washed with 1X PBS to  
1026 remove floating cells and create a cell-free wound area. The closure of the wound was monitored by  
1027 time-lapse. Olympus ScanR inverted microscope with 10x objective was used to take pictures every  
1028 5-10 minutes over a 24 hours period (as indicated in the figure legends). The assay was performed

1029 using an environmental microscope incubator set to 37°C and 5% CO<sub>2</sub> perfusion. After cell induction,  
1030 Doxycycline Hyclate was maintained in the media for the total duration of the time-lapse experiment.  
1031 The percentage of area covered by cells (area coverage %) overtime and wound front speed were  
1032 calculated by MatLab software. In chemical inhibitors experiments, the inhibitor was added together  
1033 with Doxycycline Hyclate in fresh media 1 h before starting imaging. For cell streaming assay  
1034 performed on interfered cells, cells were interfered in suspension (first cycle) and directly plated at  
1035 the desired concentration, following the same conditions already described in “RNA interference”  
1036 section.

1037 For detection of cryptic lamellipodia, MCF10A cells stably expressing EGFP-LifeAct were mixed in  
1038 a 1:10 ratio with unlabeled cells and seeded in cell streaming assay, as described before. Cell  
1039 migration was monitored by time-lapse phase contrast and fluorescence microscopy, collecting  
1040 images at multiple stage positions in each time loop. Olympus ScanR inverted microscope with 20x  
1041 objective (+1.6x Optovar) was used to take pictures every 90 seconds. Each assay was done 5 times  
1042 and at least 25 cells/condition were counted in each experiment. Where indicated, PD0325901 was  
1043 added 1 h before imaging.

1044

#### 1045 **FRET Analysis**

1046 Using a customised macro in ImageJ, FRET data were analysed using the ratiometric approach. CFP,  
1047 YFP and FRET images were background subtracted, converted in 32bits and the smoothed YFP  
1048 image were tresholded and used as a mask to highlight the vesicular-like structures of interest. On  
1049 these areas the average FRET/CFP ratio was then calculated as described in Kardash E. et al. <sup>3</sup>

1050

#### 1051 **3D morphogenesis assay**

1052 MCF10A morphogenesis assay was per formed as already described<sup>67</sup>. Briefly, MCF10A cells were  
1053 trypsinized and resuspended in MCF10A culture medium. Eight-well chamber slides (#80826 IBIDI)

1054 were coated with 40  $\mu$ l/well of Growth Factor Reduced Matrigel Matrix Basement Membrane HC  
1055 10.2 mg/ml (#354263, Corning) or with 1:1 mixture of Matrigel HC 10.2 mg/ml and Type I Bovine  
1056 Collagen 3 mg/ml (#5005 Advanced BioMatrix). Once the matrix is polymerized,  $2.5 \times 10^3$  cells were  
1057 plated into each well on the top of the matrix layer in culture medium supplemented with 2% Matrigel  
1058 HC 10.2 mg/ml and 5 ng/ml EGF. Complete acini morphogenesis was allowed by incubating the cells  
1059 for 3 weeks and replacing assay media every four days.

1060 On day 21 acini were treated with 2.5  $\mu$ g/ml Doxycycline Hyclate to induce RAB5A expression.  
1061 Cells were maintained under stimulation for 6 days, changing the medium every 2 days, before  
1062 fixation with 4% paraformaldehyde (PFA) and stained with specific antibodies. When inhibitors were  
1063 used, the media were refreshed every day.

1064

### 1065 **3D spheroid kinematic assay**

1066 MCF10DCIS.com cells were plated on Ultra-Low attachment surface 6-well plate (#3471  
1067 CORNING) at a density of  $5 \times 10^3$  cells/well. Cells were grown in serum-free condition for 10 days  
1068 by adding fresh culture media every 2 days. Then every single well of spheres were collected and  
1069 resuspended in 150  $\mu$ l of 6 mg/ml Collagen Type I (#35429 CORNING), diluted in culture media, 50  
1070 mM Hepes, 0,12 NaHCO<sub>3</sub> and 5 mM NaOH. The unpolymerized mix sphere/collagen was placed in  
1071 Eight-well chamber slides and incubated at 37°C for o/n. The day after, before imaging, 2.5 $\mu$ g/ml  
1072 Doxycycline Hyclate was added over the polymerized collagen mix to induce RAB5A expression.

1073

### 1074 **Ex Vivo DCIS tumor slice motility assay**

1075 All animal experiments were approved by the OPBA (Organisms for the well-being of the animal) of  
1076 IFOM and Cogentech. All experiments complied with national guidelines and legislation for animal  
1077 experimentation. All mice were bred and maintained under specific pathogen-free conditions in our  
1078 animal facilities at Cogentech Consortium at the FIRC Institute of Molecular Oncology Foundation

1079 and at the European Institute of Oncology in Milan, under the authorization from the Italian Ministry  
1080 of Health (Autorizzazione N° 604-2016).

1081

1082 For mammary fat pad tumor development in NSG mice MCF10DCIS.com cells were trypsin  
1083 detached, washed twice, and resuspended in PBS to a final concentration  $2 \times 10^5/13 \mu\text{l}$ . The cell  
1084 suspension was then mixed with  $5 \mu\text{l}$  growth factor–reduced Matrigel and  $2 \mu\text{l}$  Trypan blue solution  
1085 and maintained on ice until injection. Aseptic conditions under a laminar flow hood were used  
1086 throughout the surgical procedure. Female NOD.Cg-PrkdcscidII2rgtm1Wjl/SzJ (commonly known  
1087 as the NOD SCID gamma; NSG) mice, 6–9 weeks old, were anesthetized with 375 mg/Kg Avertin,  
1088 laid on their backs, and injected with a  $20\text{-}\mu\text{l}$  cell suspension directly in the fourth mammary fad pad.  
1089 After 4 weeks mice were sacrificed and the primary tumors were removed, cut by a scalpel and each  
1090 tumor slide was placed over a metal grid inserted in 6-well plate to allow tumors to grow on an  
1091 interface air/culture medium. Before imaging,  $2.5\mu\text{g/ml}$  Doxycycline Hyclate was added to tumor  
1092 slices culture media to induce RAB5A expression. Tumor cells were maintained under stimulation  
1093 for 3 days, changing the medium every day.

1094

### 1095 **Immunofluorescence**

1096 As previously shown<sup>2</sup>, cells were fixed in 4% paraformaldehyde (PFA) and permeabilized with 0.1%  
1097 Triton X-100 and 1% BSA 10 minutes (except for EEA-1 staining, permeabilized with 0.02%  
1098 Saponin and 1% BSA 10 minutes and pERK1/2 staining, permeabilized with ice cold 100% Methanol  
1099 for 10 minutes). In EGFR staining experiments, permeabilization step was avoided where indicated  
1100 (non-permeabilized conditions) in order to detect only total cell surface EGFR. After 1X PBS wash,  
1101 primary antibodies were added for 1 hour at room temperature. Coverslips were washed in 1X PBS  
1102 before secondary antibody incubation 1 hour at room temperature, protected from light. FITC- or  
1103 TRITC-phalloidin was added in the secondary antibody step, where applicable. After removal of not

1104 specifically bound antibodies by 1X PBS washing, nuclei were stained with 0.5 ng/ml DAPI. Samples  
1105 were post-fixed and mounted on glass slides in anti-fade mounting medium (Mowiol). Antibodies  
1106 were diluted in 1X PBS and 1% BSA. Images were acquired by wide-field fluorescence microscope  
1107 or confocal microscope, as indicated in figure legends.

1108 Immunofluorescence on MCF10A-derived acini was performed by fixing acini with 4%  
1109 paraformaldehyde for 20 minutes at RT. Then cells were permeabilized with 0.5% TRITON X-100  
1110 in PBS for 10 minutes at 4°C and incubated with blocking solution (PBS + 0.1% BSA + 10% goat  
1111 serum) for 1 hour at RT. Acini were incubated with indicated primary antibodies diluted in blocking  
1112 solution for o/n at 4°C. The day after acini were incubated with indicated secondary antibodies diluted  
1113 in blocking solution for 1 hour at RT. Finally, acini were incubated with DAPI in PBS for 20 minutes  
1114 at RT. Samples were then maintained at 4°C in PBS before imaging.

1115 E-cadherin staining was analysed by confocal microscopy and images were processed to obtain the  
1116 straightness index of the junction. “Junction length” was measured by tracking a straight line and  
1117 “junction tracking” was obtained by tracking manually the same junction following its profile. The  
1118 straightness index of the junction has been quantified as the ratio of the junction length and the  
1119 junction tracking.

1120

#### 1121 **<sup>125</sup>I-EGF internalization assay**

1122 Internalization of <sup>125</sup>I-EGF was performed at low EGF (1 ng/ml) or high EGF (30 ng/ml) as described  
1123 in ref.<sup>4</sup>.

1124 Briefly, MCF10A cells were plated in 24-well plates in at least duplicate for each time point, plus  
1125 one well to assess non-specific binding. Cell monolayers were EGF-starved 24 hours and induced  
1126 overnight by Doxycycline Hyclate. The day after cells were incubated in assay medium (DMEM/F12  
1127 supplemented with Cholera Toxin (100 ng/ml), 0,1% BSA, 20mM HEPES, DOX (2.5µg/ml) and then  
1128 incubated at 37°C in the presence of 1 ng/ml <sup>125</sup>I-EGF, or 30 ng/ml EGF (1 ng/ml <sup>125</sup>I-EGF (Perkin

1129 Elmer) + 29 ng/ml cold EGF. At different time points (2, 4, 6 min) the amount of bound  $^{125}\text{I}$ -EGF  
1130 was measured with an acid wash solution pH 2.5 (0.2 M acetic acid, 0.5 M NaCl). Cells were then  
1131 lysed with 1N NaOH, which represents the amount of internalized  $^{125}\text{I}$ -EGF. Non-specific binding  
1132 was measured at each time point in the presence of an excess of non-radioactive EGF (300 times).  
1133 After being corrected for non-specific binding, the rate of internalisation was calculated as the ratio  
1134 between internalised and surface-bound radioactivity. Surface EGFRs were measured by  $^{125}\text{I}$ -EGF  
1135 saturation binding as described<sup>5</sup>.

1136

### 1137 **EGF recycling assay**

1138 Recycling assays of  $^{125}\text{I}$ -EGF were performed as described in<sup>5</sup>. In brief, cell monolayers were EGF-  
1139 starved 24 hours and induced overnight by Doxycycline Hyclate. The day after cells were incubated  
1140 in assay medium (DMEM/F12 supplemented with Cholera Toxin (100ng/ml) , 0,1% BSA, 20mM  
1141 Hepes, DOX (2.5 $\mu\text{g}/\text{ml}$ ), then incubated with  $^{125}\text{I}$ -EGF (30 ng/ml: 5 ng/ml of  $^{125}\text{I}$ -EGF + 25 ng/ml of  
1142 cold EGF) for 15 min at 37 °C, followed by mild acid/salt treatment (buffer at pH 4.5, 0.2 M Na  
1143 acetate pH 4.5, 0.5 M NaCl) to remove bound EGF. Cells were then chased at 37°C in a medium  
1144 containing 4  $\mu\text{g}/\text{ml}$  EGF for the indicated times, to allow internalization and recycling. At the end of  
1145 each chase time, the medium was collected, half was counted directly (free) and half was subjected  
1146 to TCA precipitation to determine the amount of intact/recycled (TCA precipitable) and degraded  
1147 (TCA soluble)  $^{125}\text{I}$ -EGF present in it. Surface-bound  $^{125}\text{I}$ -EGF was extracted by acid treatment (0.5M  
1148 NaCl, 0.2M acid acetic). Finally, cells were lysed in 1N NaOH to determine intracellular  $^{125}\text{I}$ -EGF.  
1149 Data are expressed as the fraction of intact  $^{125}\text{I}$ -EGF in the medium with respect to the total (total  
1150 medium + total surface + total intracellular). Non-specific counts were measured for each time point  
1151 in the presence of a 300-fold excess of cold ligand, and were never >3-10 % of the total counts.

1152

### 1153 **Image acquisition**



1154 Time-lapse imaging of 3D acini/spheroids motility was performed on a Leica TCS SP8 laser confocal  
1155 scanner mounted on a Leica DMI8 microscope equipped with motorized stage; a HC PL FLUOTAR  
1156 20X/0.5NA dry objective was used. A white light laser was used as illumination source. LAS X was  
1157 the software used for all the acquisitions.

1158 Image acquisition conditions were set to remove channel crosstalk, optimizing spectral detection  
1159 bands and scanning modalities. ImageJ software was used for data analysis.

1160 Collagen SHG analysis on collagen embedded MCF10DCIS spheroids was performed with a  
1161 confocal microscope (Leica; TCS SP5) on an upright microscope (DM6000 CFS) equipped with blue  
1162 (argon, 488 nm), yellow (561 nm solid state laser), and red (633 nm solid state laser) excitation laser  
1163 lines with an HCX PL APO 40X/1.25-0.75NA oil immersion objective and controlled by Leica LAS  
1164 AF software (Leica). We used a two-photon excitation (2PE) technique with a pulsed infrared laser  
1165 (Chameleon Ultra II; Coherent) at 980 nm.

1166 EKAREV FRET analysis was performed using a DeltaVision Elite imaging system (Applied  
1167 Precision) controlled by softWoRx Explorer 2.0 (Applied Precision) equipped with a DV Elite CMOS  
1168 camera and an inverted microscope (IX71; Olympus) using a PlanApo N 60X/1.42NA oil-immersion  
1169 objective lens.

1170 Ex vivo DCIS tumor slice motility assay was performed using an Olympus IX83 inverted microscope  
1171 controlled by CellSens software (Olympus) and equipped with a iXon Ultra Andor (EMCCD) 16 bit  
1172 camera using a UplanSApo 10X/0.4NA dry objective.

1173

#### 1174 **Electron Microscopy**

1175 Electron microscopic examination was performed as previously described<sup>6,7</sup>. A description of each  
1176 process is described below.

1177 Embedding: the tissue and 3D spheroids were fixed with of 4% paraformaldehyde  
1178 and 2.5% glutaraldehyde (EMS, USA) mixture in 0.2 M sodium cacodylate pH 7.2 for 2 hours at

1179 RT, followed by 6 washes in 0.2 sodium cacodylate pH 7.2 at RT. Then cells were incubated in 1:1  
1180 mixture of 2% osmium tetroxide and 3% potassium ferrocyanide for 1 hour at RT followed by 6  
1181 times rinsing in 0.2 M cacodylate buffer. Then the samples were sequentially treated with 0.3%  
1182 thiocarbohydrazide in 0.2 M cacodylate buffer for 10 min and 1% OsO<sub>4</sub> in 0.2 M cacodylate buffer  
1183 (pH 6,9) for 30 min. Then, samples were rinsed with 0.1 M sodium cacodylate (pH 6.9) buffer until  
1184 all traces of the yellow osmium fixative have been removed, washed in de-ionized water, treated  
1185 with 1% uranyl acetate in water for 1 h and washed in water again (Mironov et al., 2004;  
1186 Beznoussenko et al., 2015). The samples were subsequently subjected to de-hydration in ethanol  
1187 and then in acetone and embedded in Epoxy resin at RT and polymerized for at least 72 h in a 60 °C  
1188 oven. Embedded samples were then sectioned with diamond knife (Diatome, Switzerland) using  
1189 Leica ultramicrotome (Leica EM UC7; Leica Microsystems, Vienna). Sections were analyzed with  
1190 a Tecnai 20 High Voltage EM (FEI, Thermo Fisher Scientific, Eindhoven, The Netherlands)  
1191 operating at 200 kV<sup>7</sup>.

1192

### 1193 **Measurement of the cellular velocities and trajectories on monolayers**

1194 Coarse-grained maps of the instantaneous cellular velocities were obtained by analysing time-lapse  
1195 phase-contrast movies with a custom PIV software written in MATLAB<sup>2</sup>. The time interval between  
1196 consecutive frames was 5 min or 10 min. The interrogation window was 32X32 pixels (pixel size  
1197 1.29 μm or 1.6 μm), with an overlap of 50% between adjacent windows. The number of cell  
1198 comprised within one field-of-view (FOV) was typically 2500. For a given monolayer, time-lapse  
1199 images from different (typically from 5 to 10) FOVs were simultaneously collected.

1200 The instantaneous root mean square velocity  $v_{RMS}(t)$  of a cell monolayer was computed as

1201  $v_{RMS}(t) = \sqrt{\langle |\mathbf{v}(t)|^2 \rangle_{\mathbf{x},j}}$ , where is the instantaneous velocity vector  $\mathbf{v}(t)$  and  $\langle \cdot \rangle_{\mathbf{x},j}$  indicates an

1202 average over all grid points  $\mathbf{x}$  (corresponding to the centers of the PIV interrogation windows) and

1203 FOVs  $j$ , respectively.

1204 The instantaneous order parameter  $\psi(t)$  of a cell monolayer was computed as  $\psi(t) = \frac{\langle |\langle \mathbf{v}(t) \rangle_x|^2 \rangle_j}{\langle |\mathbf{v}(t)|^2 \rangle_x}$ .

1205 This definition is such that  $0 \leq \psi(t) \leq 1$ . In particular,  $\psi(t) = 1$  only if, within each FOV, the  
1206 velocity field is perfectly uniform, *i.e.* all the cells in the monolayer move with the same speed and  
1207 in the same direction. On the contrary  $\psi(t) \cong 0$  is expected for a randomly oriented velocity field.

1208 The vectorial velocity correlation functions were calculated as  $C_{VV}(r) = \frac{\langle \langle \mathbf{v}(x+r,t) \cdot \mathbf{v}(x,t) \rangle_{x,t} \rangle_j}{\langle |\mathbf{v}|^2 \rangle_{x,t}}$ .

1209 Unless otherwise stated in the main text, the temporal average  $\langle \cdot \rangle_t$  was always performed over the  
1210 time window comprised between 4 and 12 hours from the beginning of the image acquisition.

1211 The velocity correlation function  $L_{corr}$  is obtained by fitting  $C_{VV}(r)$  with a stretched exponential  
1212 function of the form  $f(r) = (1 - \alpha)e^{-(r/L_{corr})^\gamma} + \alpha$ . Here  $\gamma$  is a stretching exponent and  $\alpha$  is an  
1213 offset which is non-zero in presence of a collective migration of the monolayer.

1214 Cellular trajectories  $\mathbf{r}_m(t)$  were calculated by numerical integration of the instantaneous velocity  
1215 field as obtained from the PIV analysis (see ref. <sup>8</sup> and reference therein). For each FOV a number of  
1216 trajectories roughly corresponding to the number of cells was computed.

1217 Mean squared displacements (MSDs) of the cells were calculated as  $MSD(\Delta t) = \langle |\mathbf{r}_m(t + \Delta t) -$   
1218  $\mathbf{r}_m(t)|^2 \rangle$ , where the average was performed over all the trajectories and, unless otherwise stated in  
1219 the main text, in the time window comprised between 4 and 12 hours after the beginning of the  
1220 experiment. In order to estimate the persistence length  $L_{pers}$  of the cellular motion the MSD curves

1221 were fitted with a function of the form  $g(\Delta t) = (u_0 \Delta t)^2 [1 + (u_0 \Delta t / L_{pers})]^{-1}$ . This expression  
1222 describes a transition between a short-time ballistic-like scaling and a long-time diffusive scaling.

1223 The transition between the two regimes takes place for  $\Delta t \approx 1/u_0 L_{pers}$ , *i.e.* after the cell has travelled  
1224 with an approximately constant velocity over a distance  $\approx L_{pers}$ .

1225

1226 **Measurement of the cellular velocities of acini**

1227 Sequences of confocal Z stacks of 3D acini were analysed with an adapted PIV scheme in order to  
1228 extract a representative value for the migration velocity, to assess the collective nature of the cellular  
1229 motion and to detect the presence of a coherent rotational motion. Details about the imaging are given  
1230 in the paragraph “Image acquisition”.

1231 The geometrical centre  $\mathbf{x}_c$  of each acinus was determined as the centroid of the corresponding 3D  
1232 fluorescent intensity distribution (Z stack)  $I(\mathbf{x}|t)$ ,  $\mathbf{x}_c = \frac{\sum I(\mathbf{x}|t)\mathbf{x}}{\sum I(\mathbf{x},t)}$ , where the sum is performed over  
1233 all voxels and time points. For each time point, the 3D fluorescent intensity distribution was radially  
1234 projected onto the unit sphere centred in  $\mathbf{x}_c$  leading to a sequence of 2D intensity maps  $i(\theta, \varphi|t)$ ,  
1235 where  $\theta$  and  $\varphi$  are the polar and the azimuthal angle spanning the sphere, respectively. In practice,  
1236  $i(\theta, \varphi|t)$  was obtained from a representation of  $I(\mathbf{x}|t)$  in spherical coordinates, after summation over  
1237 the radial coordinate. For each time point,  $i$  is represented by a 512x128 matrix, each element  
1238 covering the Cartesian product of angular intervals of constant amplitudes  $\Delta \theta = \pi/512$  and  $\Delta \varphi =$   
1239  $2\pi/128$ , respectively.

1240 We performed on  $i$  a 2D PIV analysis as described in the previous paragraph, by treating  $(\theta, \varphi)$  as  
1241 Cartesian coordinates. The obtained coarse-grained velocity fields  $[u_\theta(\theta, \varphi|t), u_\varphi(\theta, \varphi|t)]$  (in units  
1242 of rad/hr) were then used to reconstruct the tangential velocity field  $\mathbf{v}(\theta, \varphi) = R_0 (u_\theta(\theta, \varphi|t)\mathbf{n}_\theta +$   
1243  $u_\varphi(\theta, \varphi|t) \sin \theta \mathbf{n}_\varphi)$  of the acinus. Here,  $\mathbf{n}_\theta$  and  $\mathbf{n}_\varphi$  are the polar and the azimuthal unit vector,  
1244 respectively and  $R_0 = \sqrt{\frac{\sum I(\mathbf{x}|t)(\mathbf{x}-\mathbf{x}_c)^2}{\sum I(\mathbf{x},t)}}$  is the radius of gyration of the acinus.

1245 The root mean squared velocity was calculated as  $v_{RMS}(t) = \sqrt{\langle |\mathbf{v}|^2 \rangle}$ , where the angular brackets  
1246 indicate an average performed over the whole sphere. The presence of a pattern of global rotation  
1247 was monitored by measuring the total angular momentum  $\mathbf{l} = \langle \mathbf{r} \times \mathbf{v} \rangle$ , where  $\mathbf{r}$  is a unit vector  
1248 spanning the whole sphere. The direction of  $\mathbf{l}$  identifies the orientation of the axis of instantaneous  
1249 rotation. The collective nature of the cellular motility is captured by the non-dimensional rotational

1250 order parameter  $\psi = \frac{\pi}{2} \frac{|I|^2}{v_{RMS}^2}$ . The normalization of the order parameter is such that, for a rigidly  
1251 rotating sphere,  $\psi = 1$ , while, in the absence of coordinated motion one expects  $\psi \cong 0$ .

1252

### 1253 **Kinematic and dynamical analysis of spheroids**

1254 Overall motility and internal dynamics of the spheroids were measured by analysing sequences of  
1255 confocal Z stacks, according to the following procedure, implemented in a custom MATLAB® code.

1256 More details about the imaging can be found in the paragraph “Image acquisition”.

1257 We indicate with  $R(\Theta, \mathbf{U})$  the roto-translational operator given by the composition of a 3D rotation  
1258 by an angle  $|\Theta|$  around the axis identified by the direction of the 3D vector  $\Theta$  and a translation of  
1259 vector  $\mathbf{U}$ .  $R(\Theta, \mathbf{U})$  is a linear operator and its numerical implementation as a transformation between  
1260 3D matrices (Z stacks) was realized *via* the MATLAB functions *imwrap* and *affine3d*.

1261 Let us consider two 3D stacks  $I(\mathbf{x}, t)$  and  $I(\mathbf{x}, t + \Delta t_0)$ , where  $\Delta t_0$  is delay between consecutive  
1262 stacks. We define  $\Omega(t)$  and  $\mathbf{U}(t)$  as the 3D vectors that minimize the distance  $d$  (namely, the  
1263 variance of the difference) between  $I(\mathbf{x}, t + \Delta t_0)$  and  $R(\omega\Delta t_0, \mathbf{u})I(\mathbf{x}, t)$ ,  $d(\omega, \mathbf{u}|t) = \|I(\mathbf{x}, t +$   
1264  $\Delta t_0) - R(\omega\Delta t_0, \mathbf{u})I(\mathbf{x}, t)\|^2$ . Numerically, the minimization is performed by exploiting the  
1265 MATLAB function *imregtform*. In substance,  $R(\Omega(t)\Delta t_0, \mathbf{U}(t))$  is the rigid transformation that  
1266 reproduces at best the changes occurred in  $I(\mathbf{x}, t)$  during the time interval  $\Delta t_0$ . According to the  
1267 definitions above,  $\Omega(t)$  provides the best estimate for the instantaneous vectorial angular velocity of  
1268 the spheroid, the direction of  $\mathbf{n}(t) = \frac{\Omega(t)}{|\Omega(t)|}$  identifying the axis of instantaneous rotation. The  
1269 temporal persistence of the rotational motion is captured by the orientational correlation function  
1270  $C_n(\Delta t) = \langle \mathbf{n}(t + \Delta t) \cdot \mathbf{n}(t) \rangle_t$ , where  $\Delta t = n\Delta t_0$ . In order to estimate the rotational correlation time  
1271  $\tau_P$ ,  $C_n(\Delta t)$  was fitted with an exponential function of the form  $f(\Delta t) = \exp(-\Delta t/\tau_P)$ .

1272 The non-rigid part of the changes occurring within a spheroid between time  $t$  and  $t + \Delta t$ , where  $\Delta t =$   
1273  $n\Delta t_0$ , is captured by the parameter:  $q(\Delta t, t) = 1 - \beta^{-1} \|I(\mathbf{x}, t + \Delta t) - T(\Delta t, t)I(\mathbf{x}, t)\|$ , where

1274  $T(\Delta t, t) = R(\mathbf{\Omega}(t + n\Delta t_0)\Delta t, \mathbf{U}(t + n\Delta t_0)) \circ R(\mathbf{\Omega}(t + (n - 1)\Delta t_0)\Delta t, \mathbf{U}(t + (n - 1)\Delta t_0)) \circ \dots \circ$   
1275  $R(\mathbf{\Omega}(t)\Delta t, \mathbf{U}(t))$  is the composition of elementary roto-translations and  $\beta \equiv 2(\langle I^2 \rangle - \langle I \rangle^2)$ . The  
1276 definition of  $q$  is such that, neglecting noise and truncation errors,  $q \cong 1$  if the spheroids is immobile  
1277 or if it undergoes a perfectly rigid displacement and/or rotation, with no relative motion between  
1278 different cells. On the contrary, one gets  $q \cong 0$  when almost all the cells have performed positional  
1279 rearrangements on a length scale comparable with their size, leading to a substantial change in the  
1280 local structure<sup>9</sup>. We consider in particular the so-called overlap parameter  $Q$ , obtained as a temporal  
1281 average of  $q$ :  $Q(\Delta t) = \langle q(\Delta t, t) \rangle_t$ . By fitting the decay of  $Q$  with an exponential function  $Q(\Delta t) =$   
1282  $Q_0 e^{-\Delta t/\tau}$  we can extract an estimate of the characteristic correlation time  $\tau$  after which an almost  
1283 complete change in the cellular configuration has occurred.

1284

### 1285 **PIV analysis on ex vivo tumour slices**

1286 Maps of the instantaneous cellular velocities were obtained by analysing time-lapse movies by  
1287 performing a PIV analysis using the MATLAB (Release R2017b The MathWorks, Inc., Natick,  
1288 Massachusetts, United States) MPIV toolbox (<http://www.oceanwave.jp/software/mpiv/>)<sup>10</sup>  
1289 with the correlation algorithm and an interrogation window of 24 pixels X 24 pixels (1 pixel = 1.4  
1290  $\mu\text{m}$ ).

1291 The analysis was performed on 3 independent experiments per condition on border sections of the  
1292 tumour (for a total of 5 field of view per condition).

1293 The instantaneous root mean square velocity  $v_{RMS}(t)$  of a single Field of View was calculated as:

1294 
$$v_{RMS.}(t) = \frac{1}{N} \sqrt{\sum_{n=1}^N |\mathbf{v}(\mathbf{x}_n, t)|^2}$$

1295

1296 where  $N$  is the number of grid points in the field of view and  $v(x_n, t)$  is the instantaneous velocity at  
1297 the  $n$ th grid point  $x_n$ .

1298

### 1299 **Statistical analysis**

1300 Student's unpaired and paired t-test was used for determining the statistical significance. Significance  
1301 was defined as \* $p < 0.05$ ; \*\* $p < 0.01$ ; \*\*\* $p < 0.001$  and \*\*\*\* $p < 0.0001$ . Statistic calculations were  
1302 performed with GraphPad Prism Software. Data are expressed as mean $\pm$ SD, unless otherwise  
1303 indicated.

1304

### 1305 **References (Methods)**

1306

- 1307 1. Komatsu, N. *et al.* Development of an optimized backbone of FRET biosensors for kinases  
1308 and GTPases. *Mol Biol Cell* **22**, 4647-4656 (2011).
- 1309 2. Malinverno, C. *et al.* Endocytic reawakening of motility in jammed epithelia. *Nature*  
1310 *materials* **16**, 587-596 (2017).
- 1311 3. Kardash, E., Bandemer, J. & Raz, E. Imaging protein activity in live embryos using  
1312 fluorescence resonance energy transfer biosensors. *Nat Protoc* **6**, 1835-1846 (2011).
- 1313 4. Caldieri, G. *et al.* Reticulon 3-dependent ER-PM contact sites control EGFR nonclathrin  
1314 endocytosis. *Science* **356**, 617-624 (2017).
- 1315 5. Sigismund, S. *et al.* Clathrin-mediated internalization is essential for sustained EGFR  
1316 signaling but dispensable for degradation. *Dev Cell* **15**, 209-219 (2008).
- 1317 6. Beznoussenko, G.V., Ragnini-Wilson, A., Wilson, C. & Mironov, A.A. Three-dimensional  
1318 and immune electron microscopic analysis of the secretory pathway in *Saccharomyces*  
1319 *cerevisiae*. *Histochem Cell Biol* **146**, 515-527 (2016).
- 1320 7. Beznoussenko, G.V. & Mironov, A.A. Correlative video-light-electron microscopy of mobile  
1321 organelles. *Methods Mol Biol* **1270**, 321-346 (2015).
- 1322 8. Park, J.A. *et al.* Unjamming and cell shape in the asthmatic airway epithelium. *Nature*  
1323 *materials* **14**, 1040-1048 (2015).

- 1324 9. Pastore, R., Pesce, G. & Caggioni, M. Differential Variance Analysis: a direct method to  
1325 quantify and visualize dynamic heterogeneities. *Scientific reports* **7**, 43496 (2017).
- 1326 10. Mori, N. & Chang, K.-A. Experimental Study of a Horizontal Jet in a Wavy Environment.  
1327 *Journal of Engineering Mechanics* **129**, 1149-1155 (2003).
- 1328
- 1329
